# Supplementary material for: Nitrogen-Based Linkers with a Mesitylene Core: Synthesis and Characterization
Source: MDPI journal article supplement (doi:10.3390/molecules26195952), 2021-09-30
Supplement: s1 [file s1]

# **Supporting Information**

for

## **Azole-linkers with a mesitylene core: synthesis and characterization**

Lucian G. Bahrin, Alina Nicolescu, Sergiu Shova, Narcisa L. Marangoci, Lucian M. Birsa and Laura G. Sarbu

## **Synthetic procedures, NMR spectra and crystallographic data**

## Contents

|                    |     |
|--------------------|-----|
| NMR spectra.....   | S3  |
| EI-MS spectra..... | S22 |
| X-Ray data.....    | S32 |

## NMR Spectra

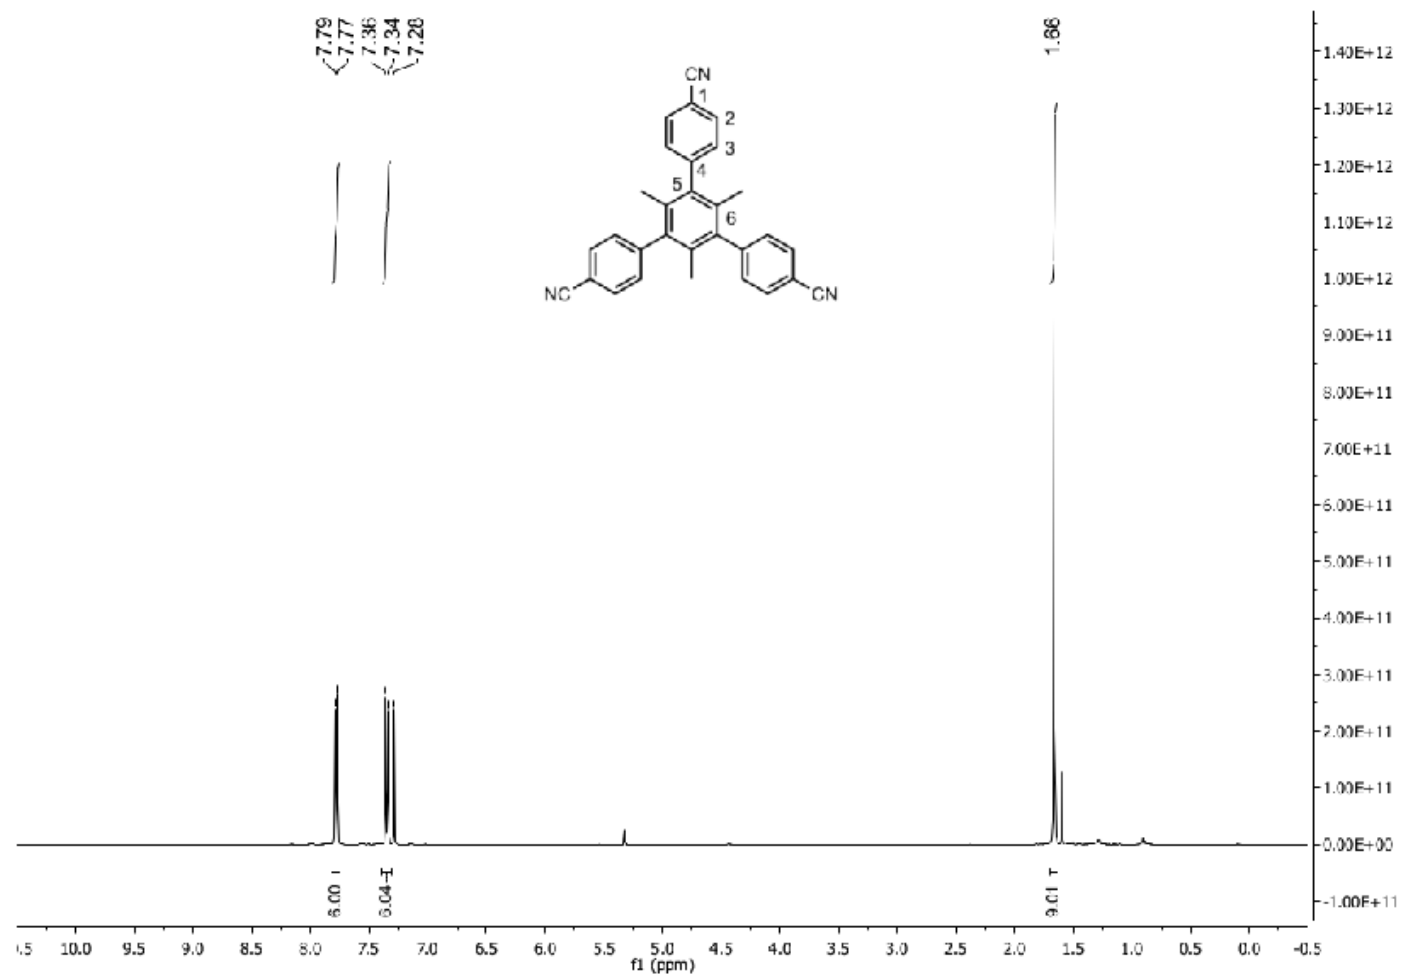

Figure S1 – The  $^1\text{H}$  NMR spectrum of **2**, measured in  $\text{CDCl}_3$ .

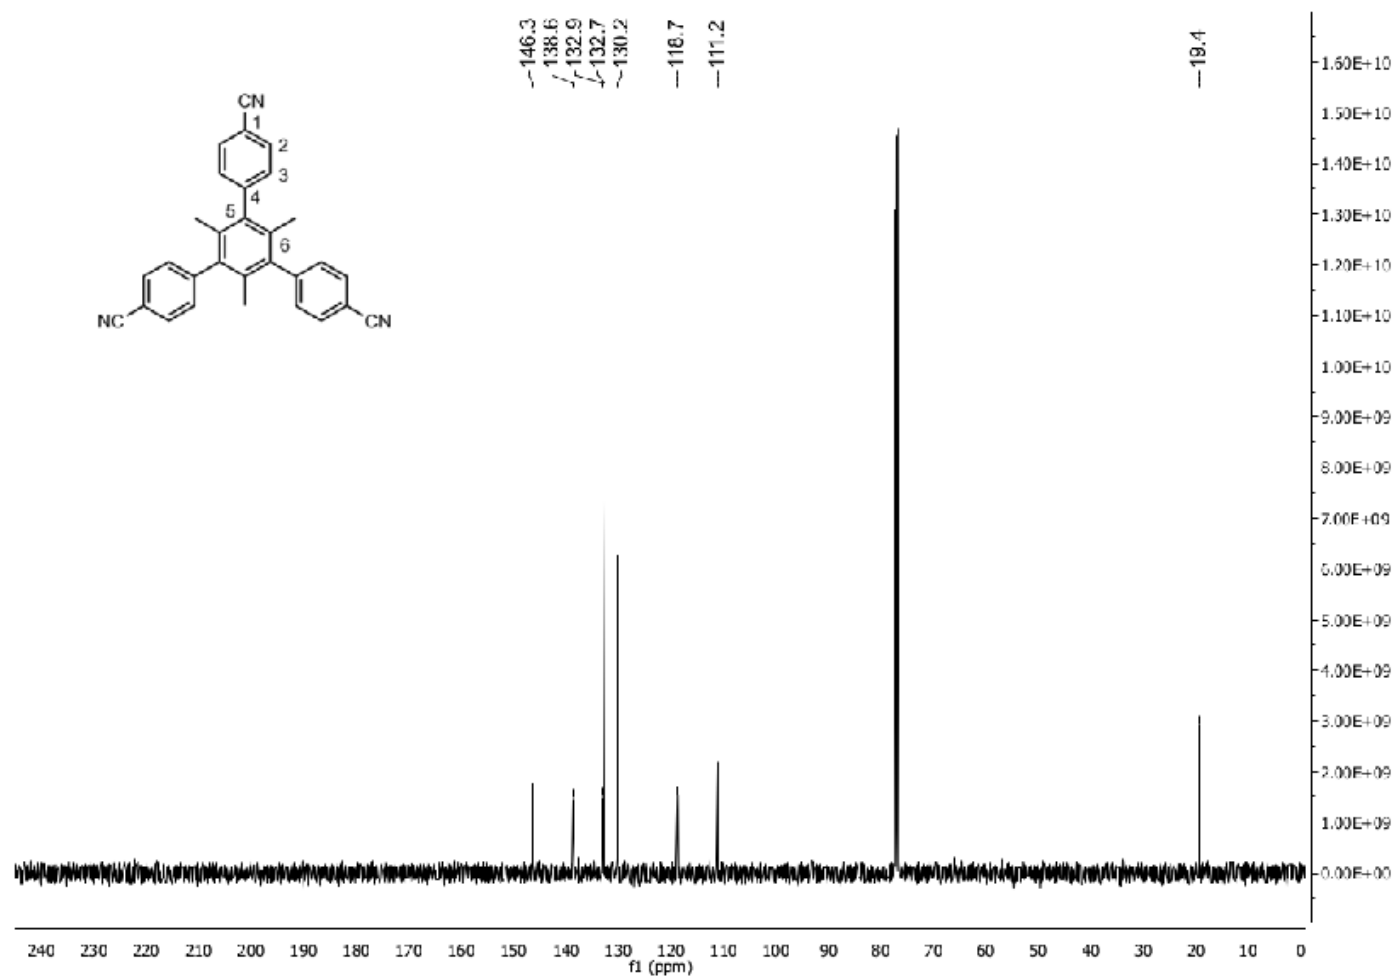

Figure S2 – The  $^{13}\text{C}$  NMR spectrum of **2**, measured in  $\text{CDCl}_3$ .

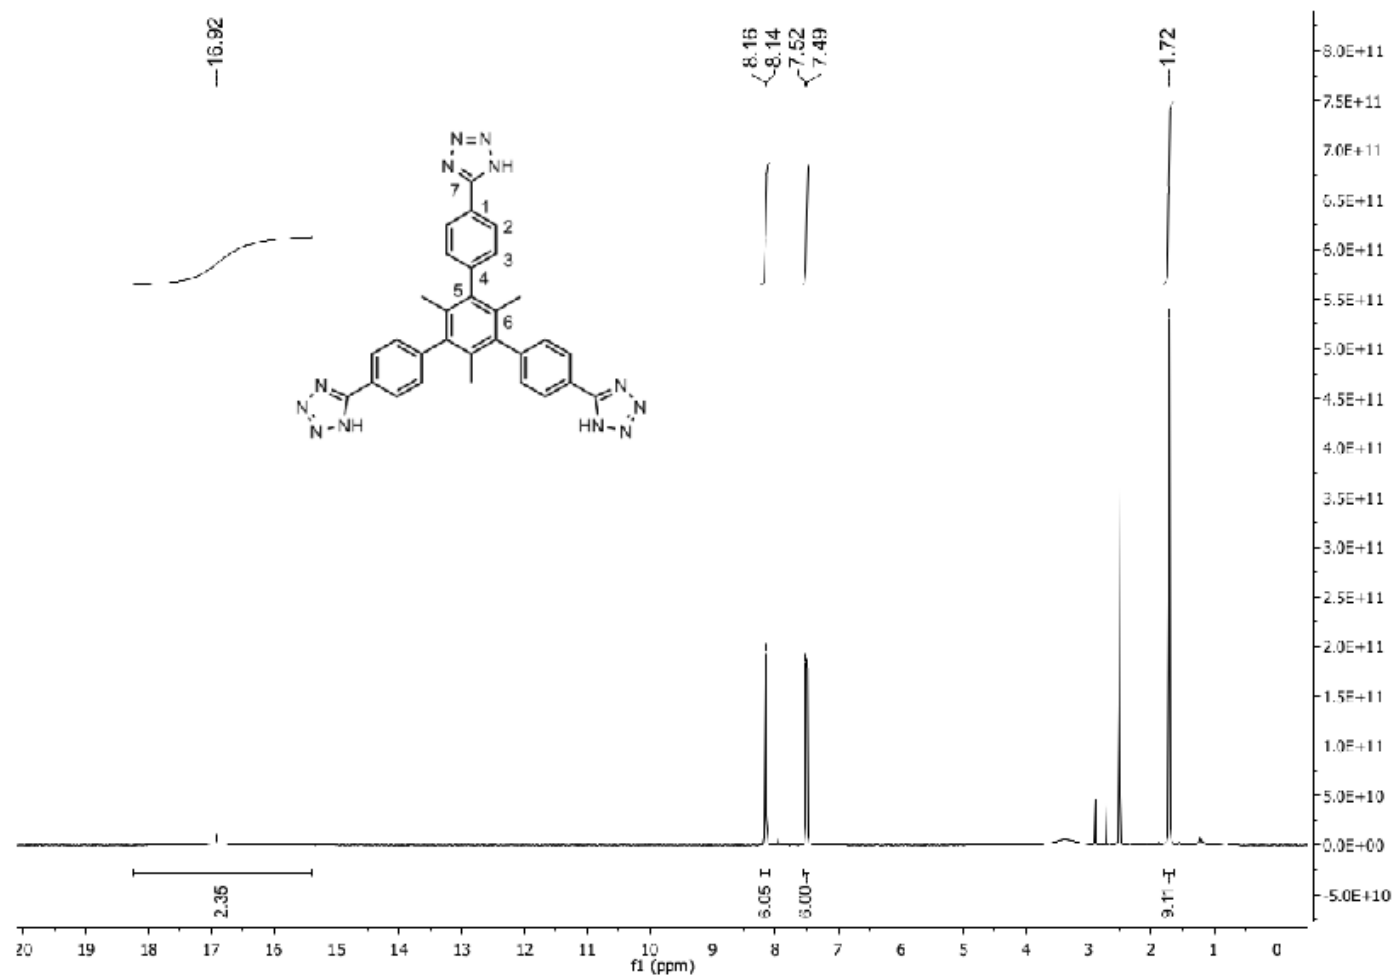

Figure S3 – The  $^1\text{H}$  NMR spectrum of **3**, measured in  $\text{DMSO}-d_6$ .

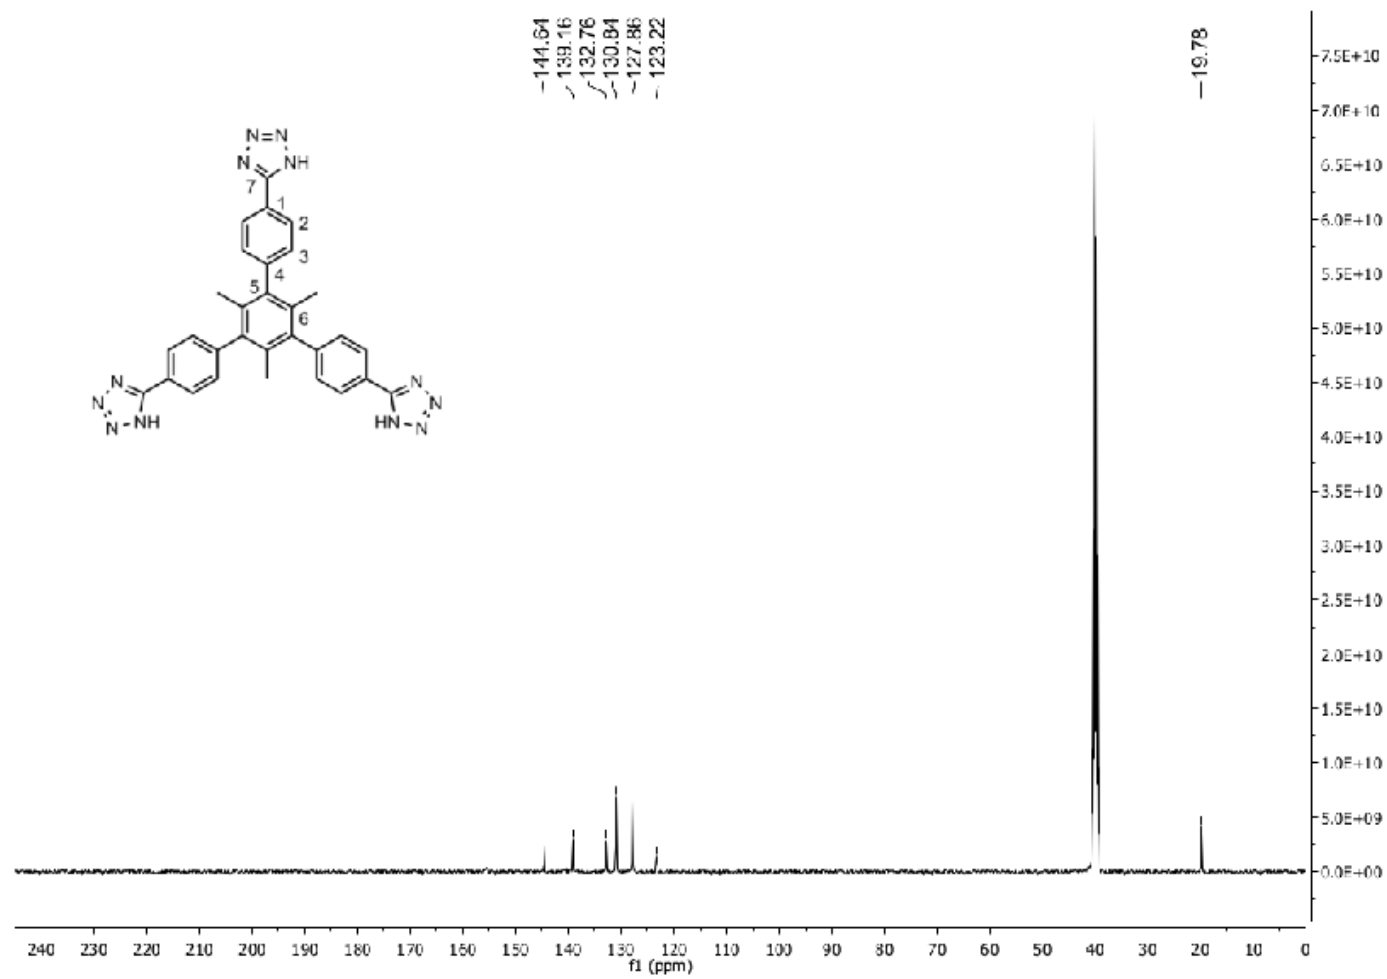

Figure S4 – The  $^{13}\text{C}$  NMR spectrum of **3**, measured in  $\text{DMSO}-d_6$ .

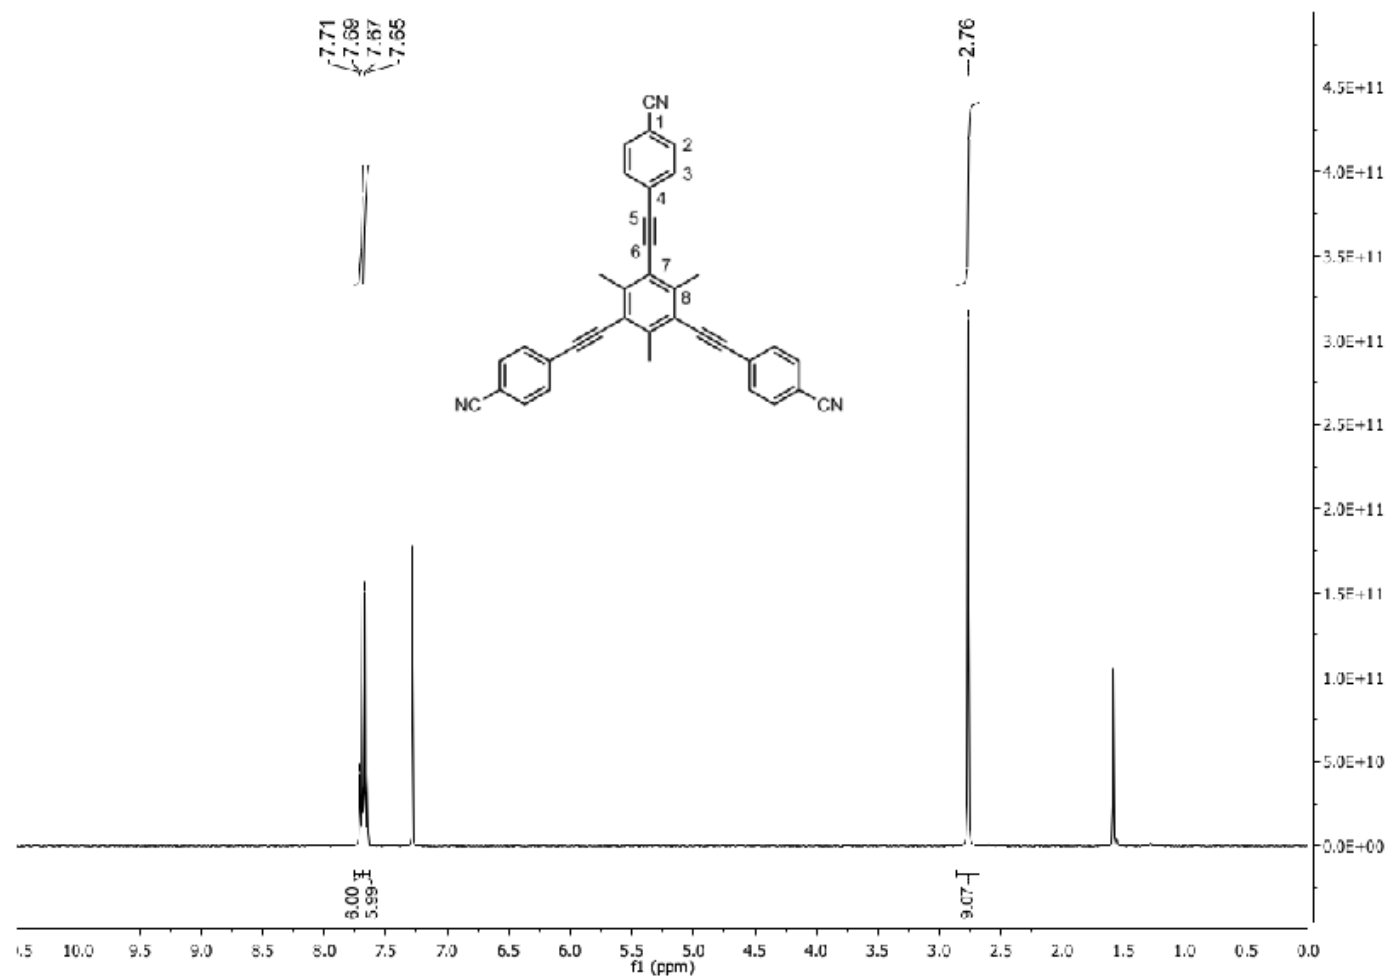

Figure S5 – The  $^1\text{H}$  NMR spectrum of **4**, measured in  $\text{CDCl}_3$ .



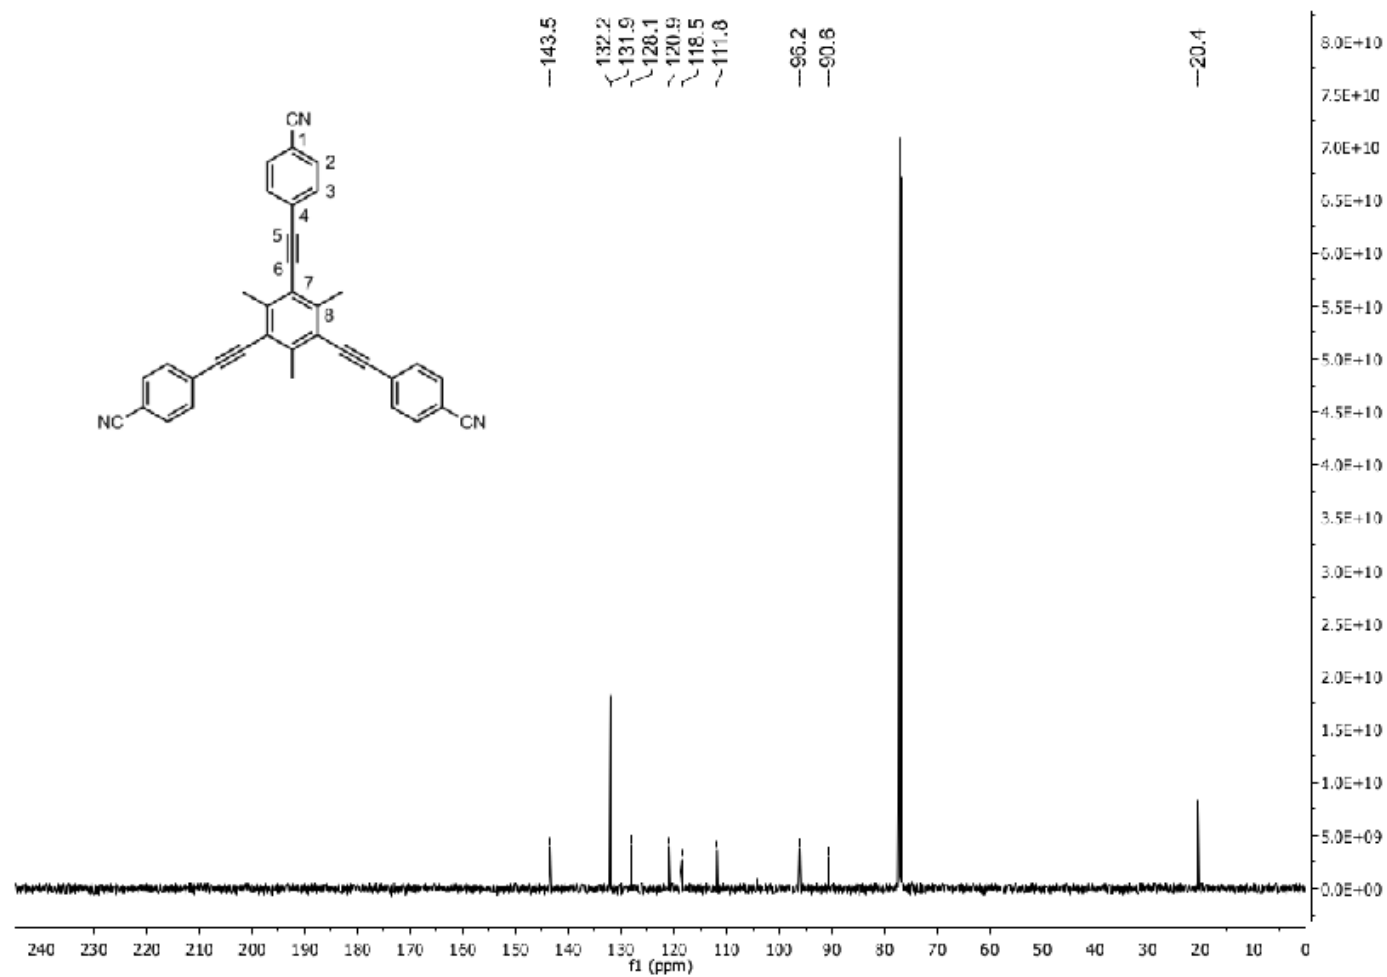

Figure S6 – The  $^{13}\text{C}$  NMR spectrum of **4**, measured in  $\text{CDCl}_3$ .

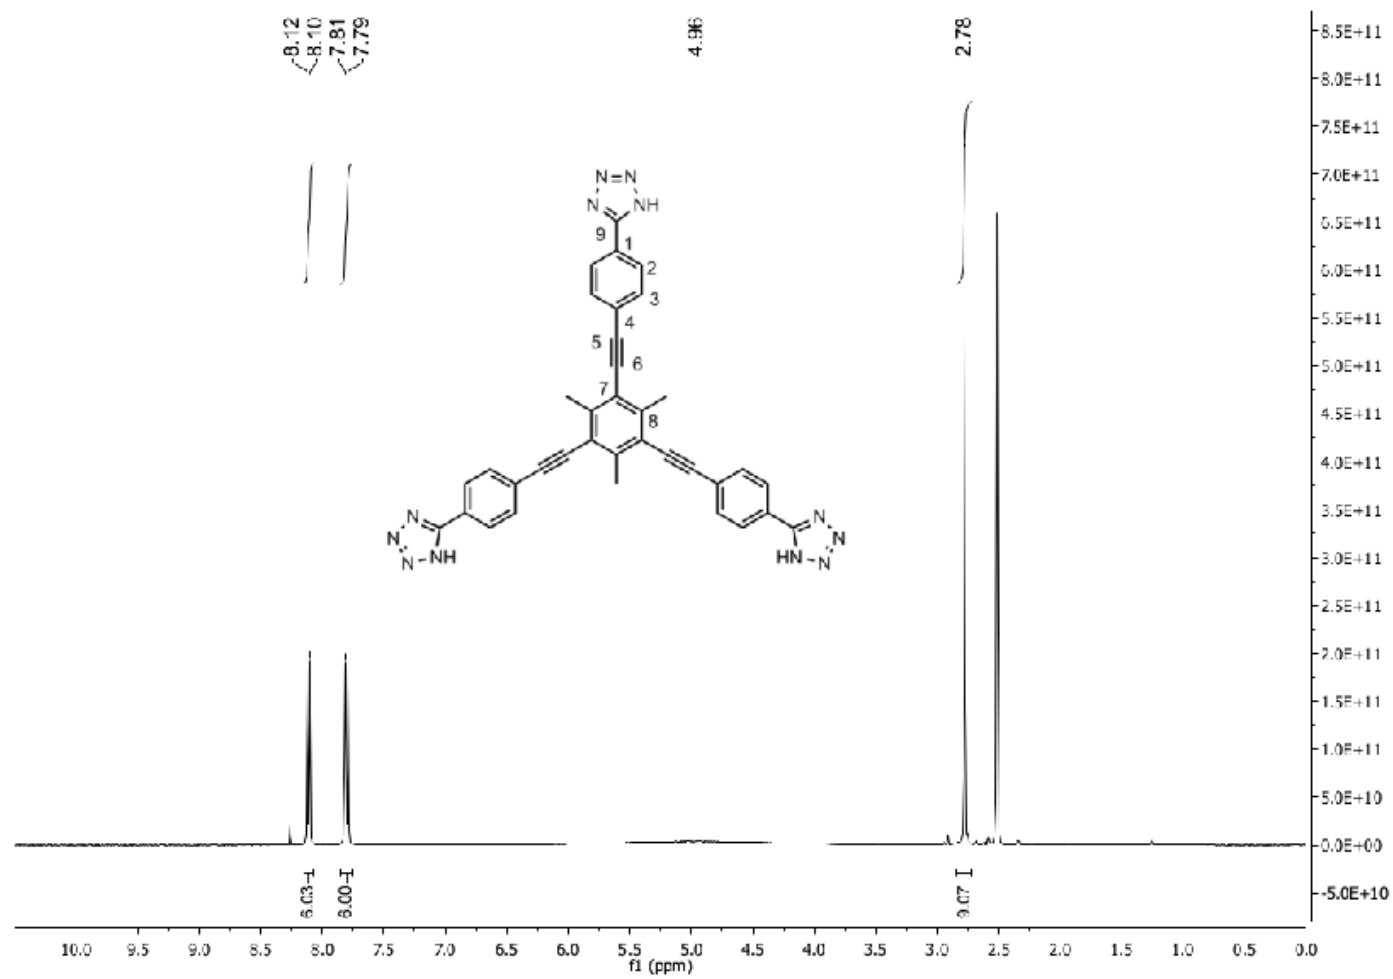

Figure S7 – The  $^1\text{H}$  NMR spectrum of **5**, measured in  $\text{DMSO-}d_6$ .

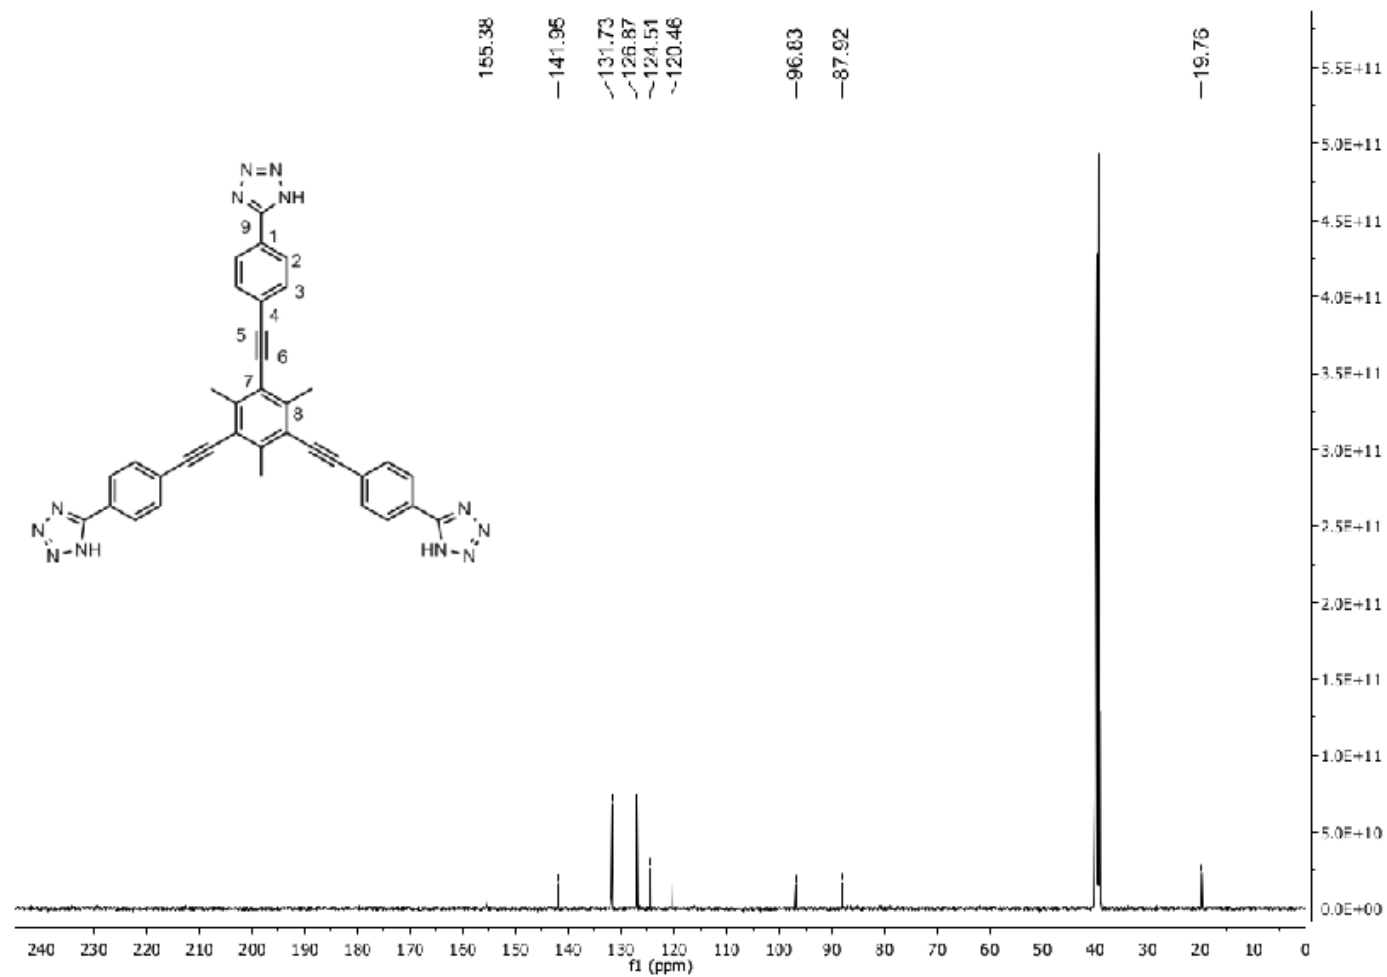

Figure S8 – The <sup>13</sup>C NMR spectrum of **5**, measured in DMSO-*d*<sub>6</sub>.

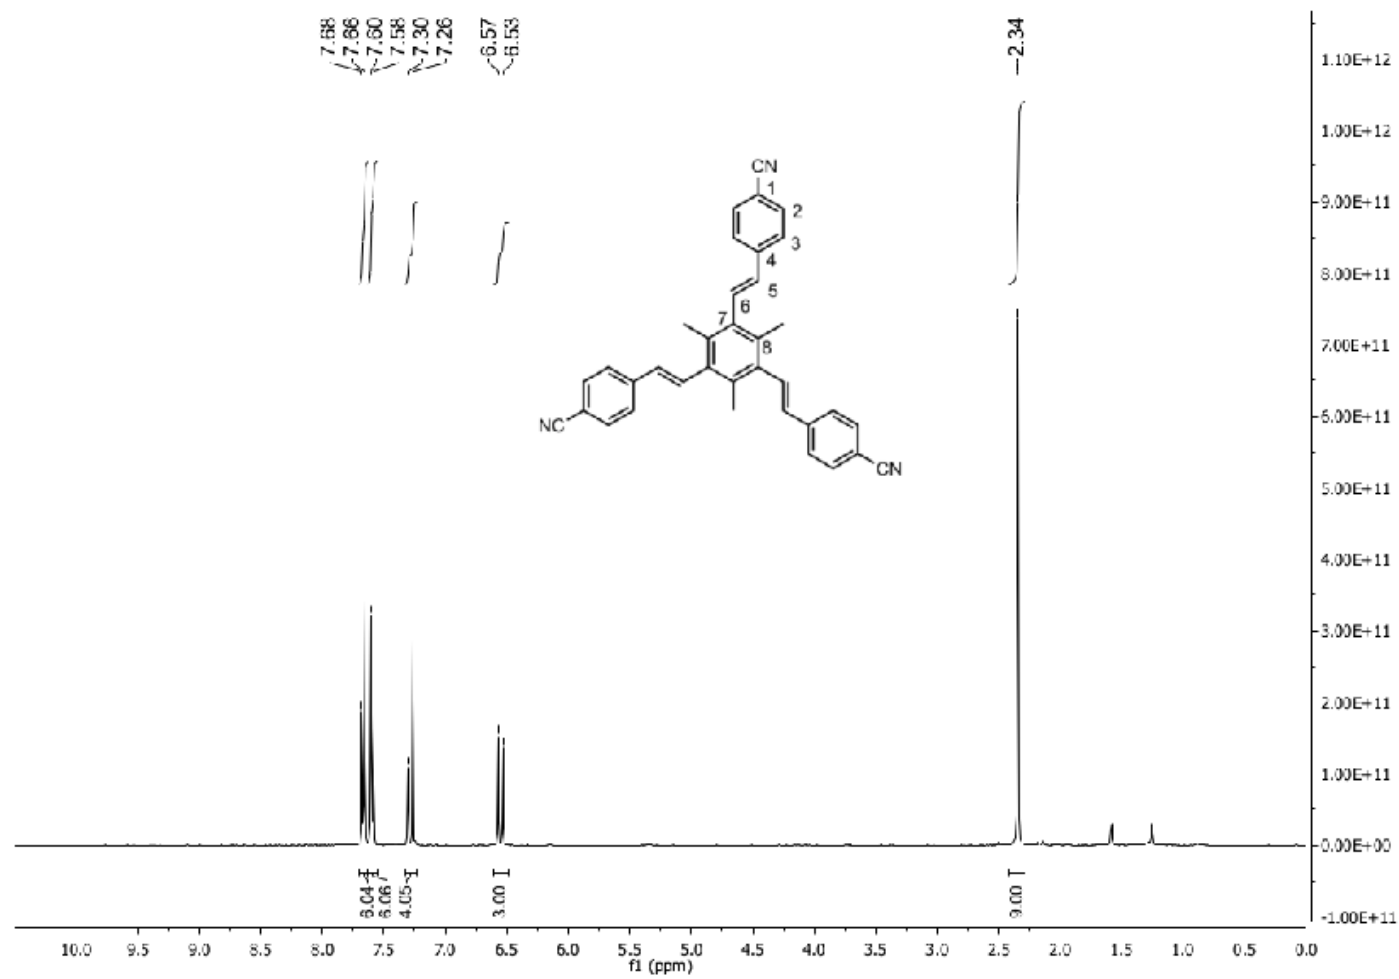

Figure S9 – The  $^1\text{H}$  NMR spectrum of **6**, measured in  $\text{CDCl}_3$ .

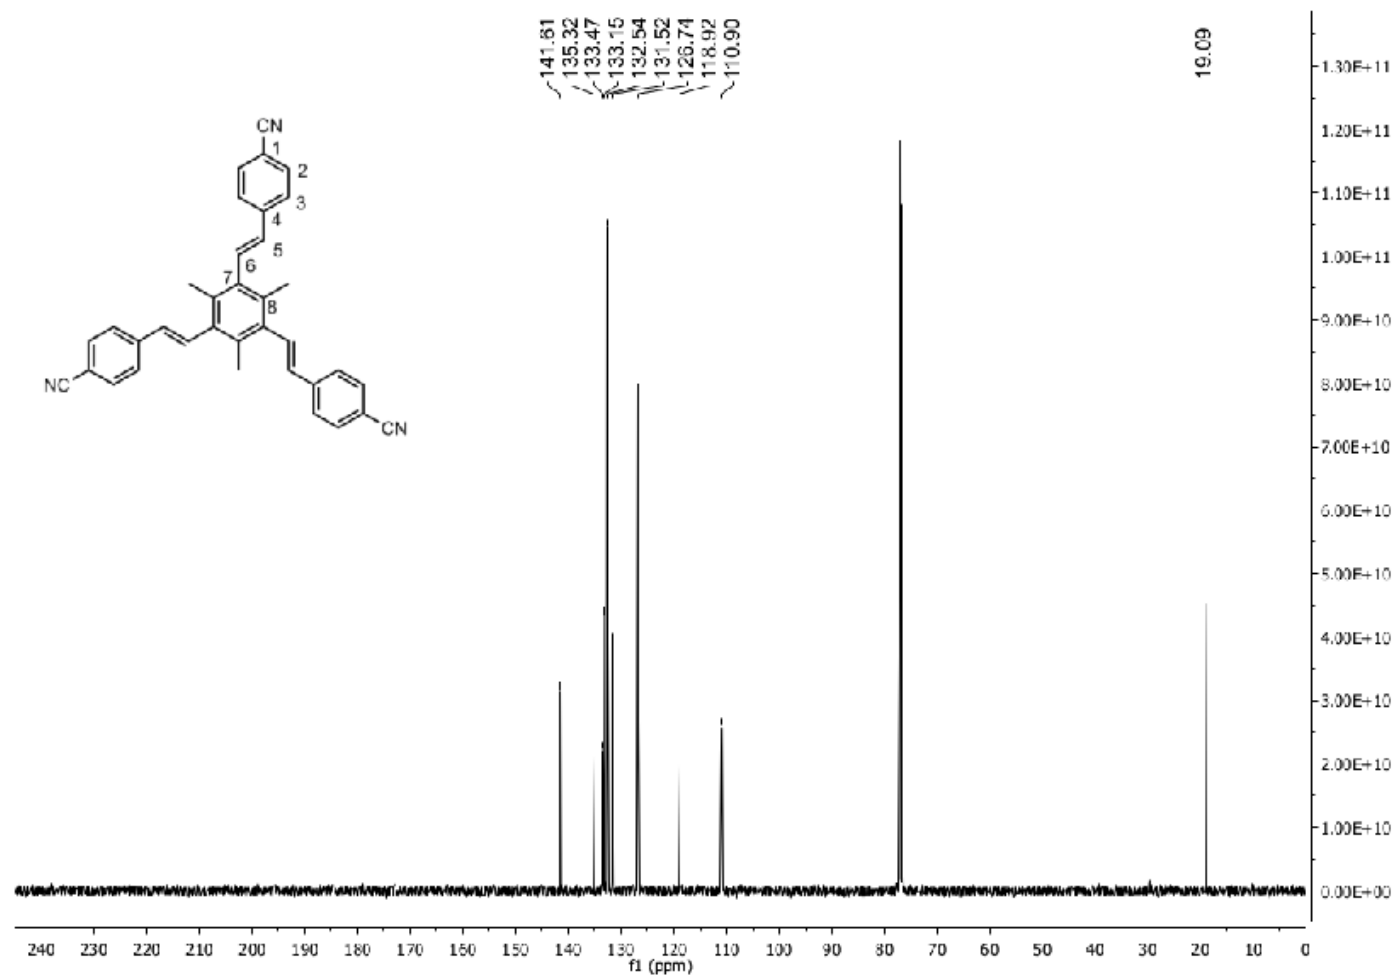

Figure S10 – The <sup>13</sup>C NMR spectrum of **6**, measured in CDCl<sub>3</sub>.

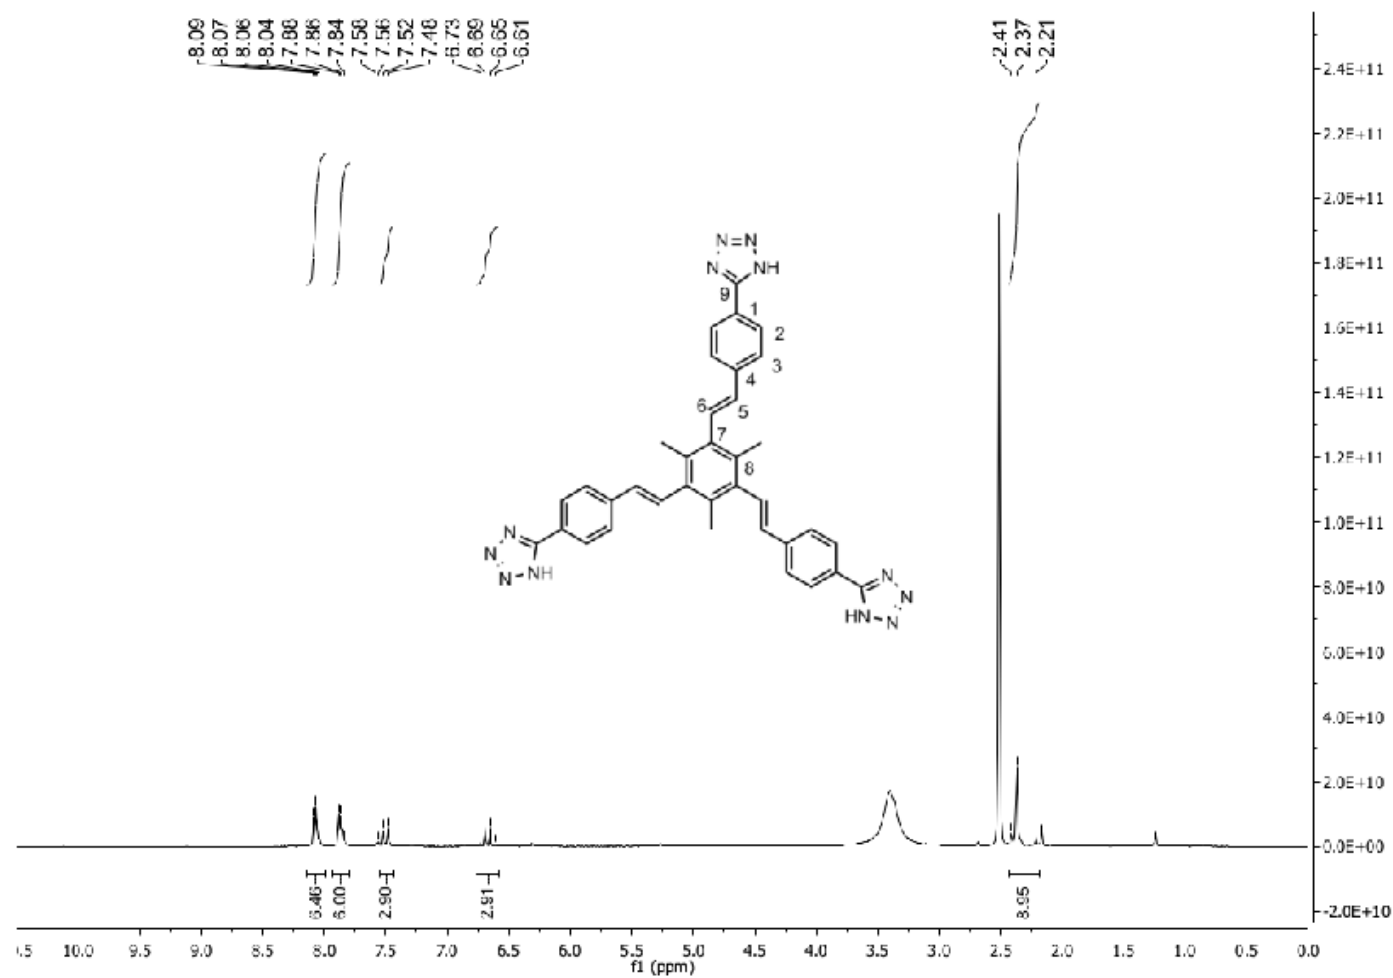

Figure S11 – The  $^1\text{H}$  NMR spectrum of **7**, measured in  $\text{DMSO-}d_6$ .

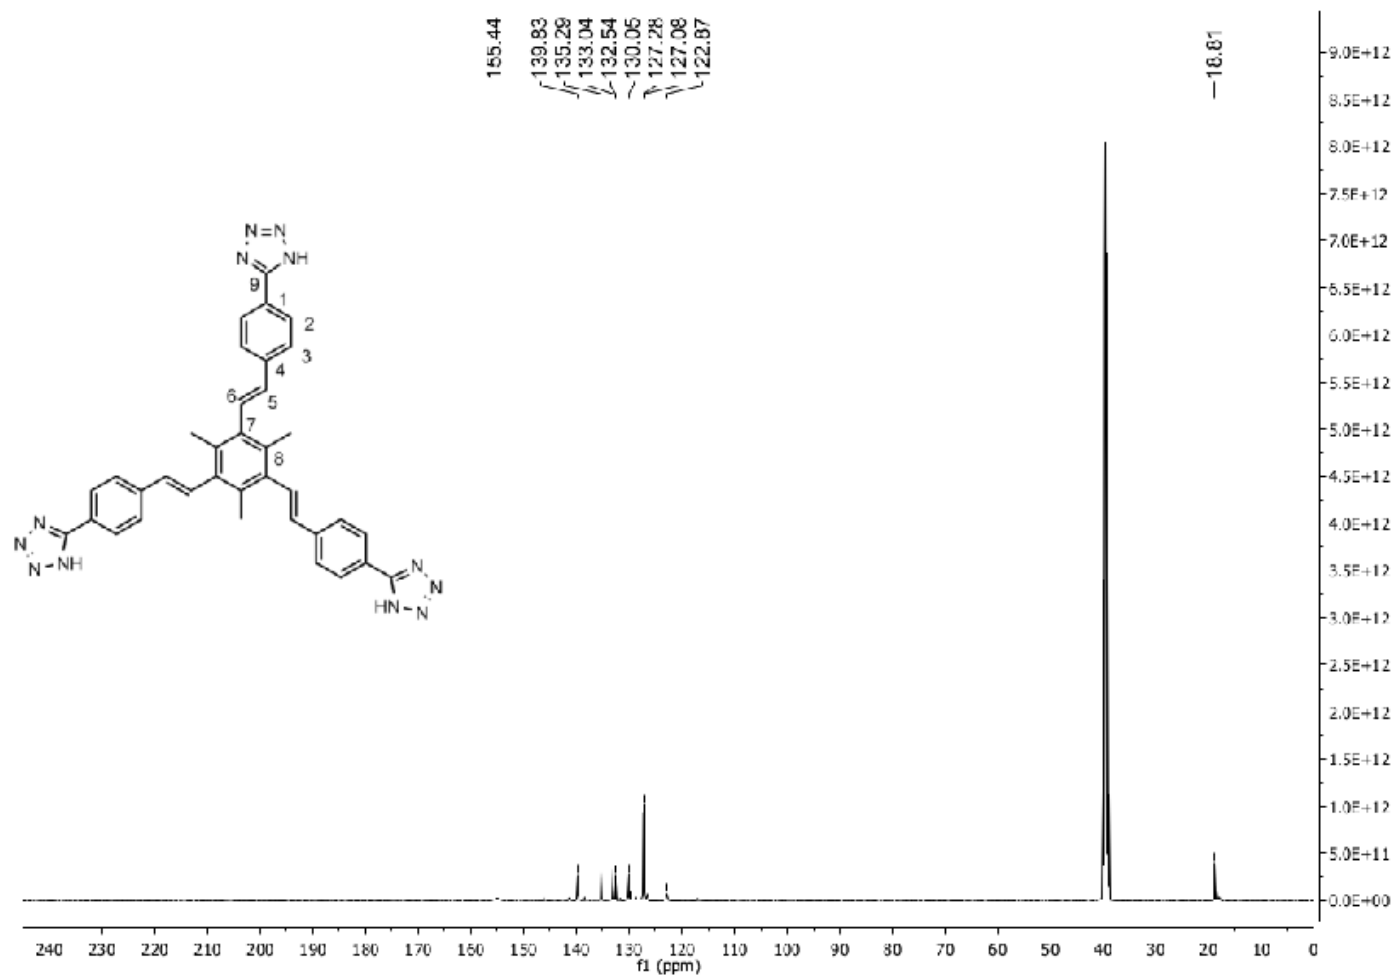

Figure S12 – The <sup>13</sup>C NMR spectrum of **7**, measured in DMSO-*d*<sub>6</sub>.

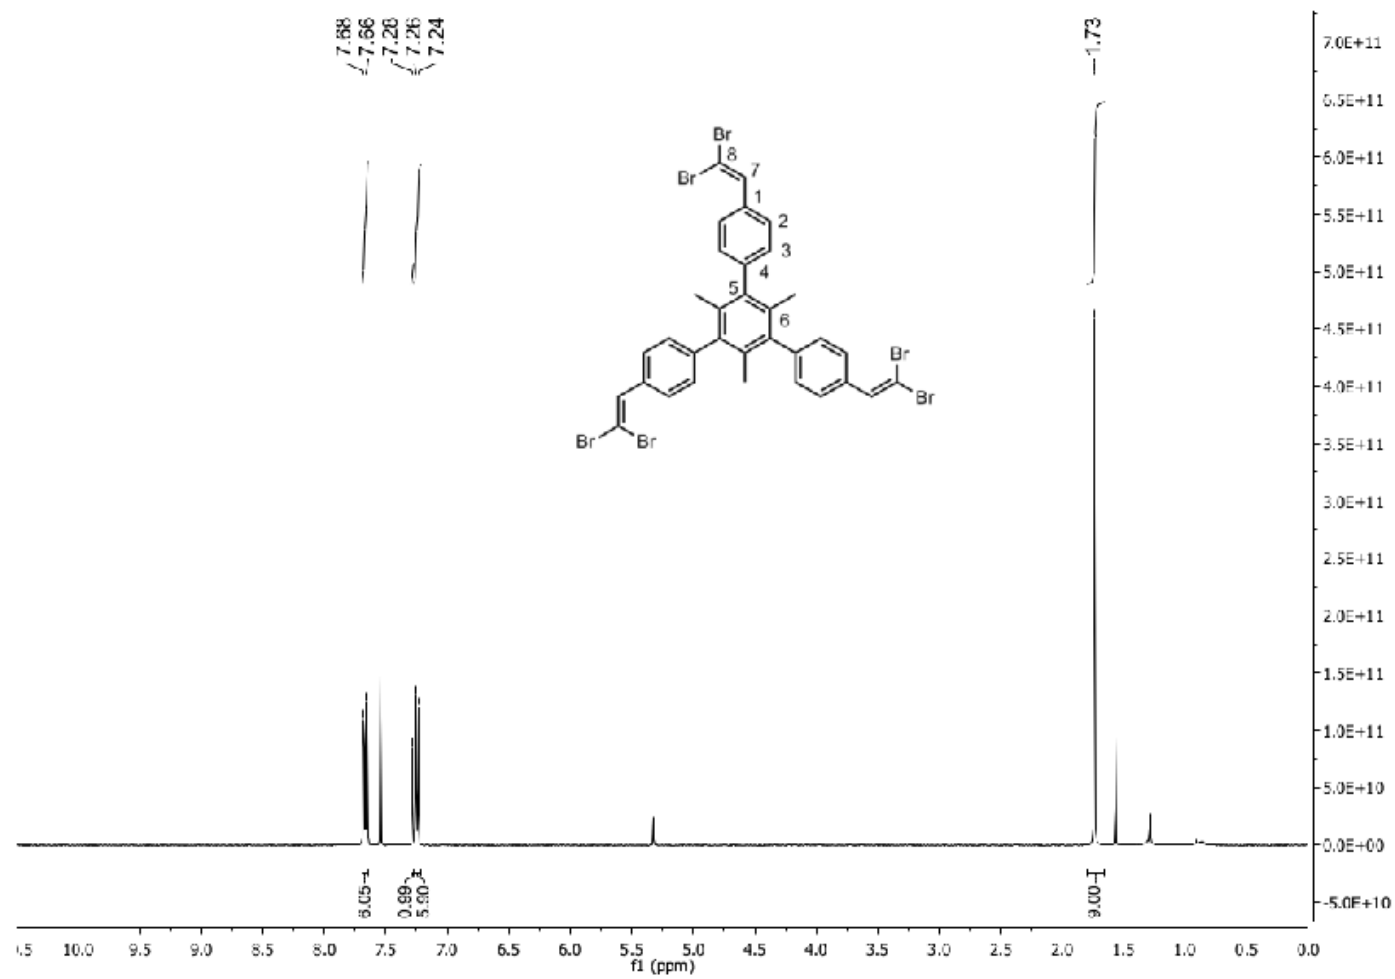



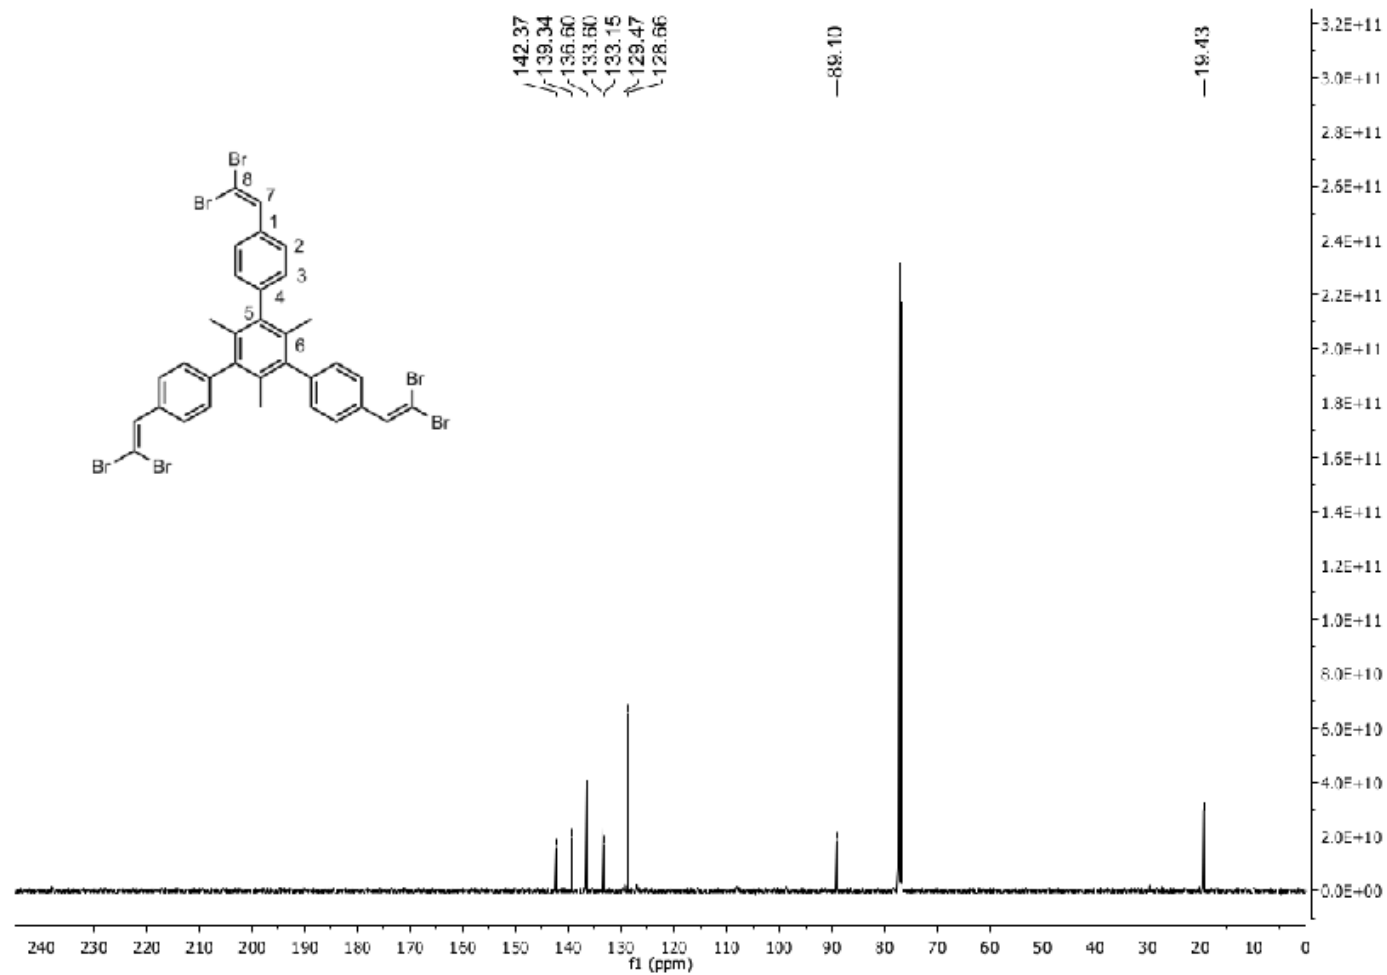

Figure S14 – The <sup>13</sup>C NMR spectrum of **9**, measured in CDCl<sub>3</sub>.

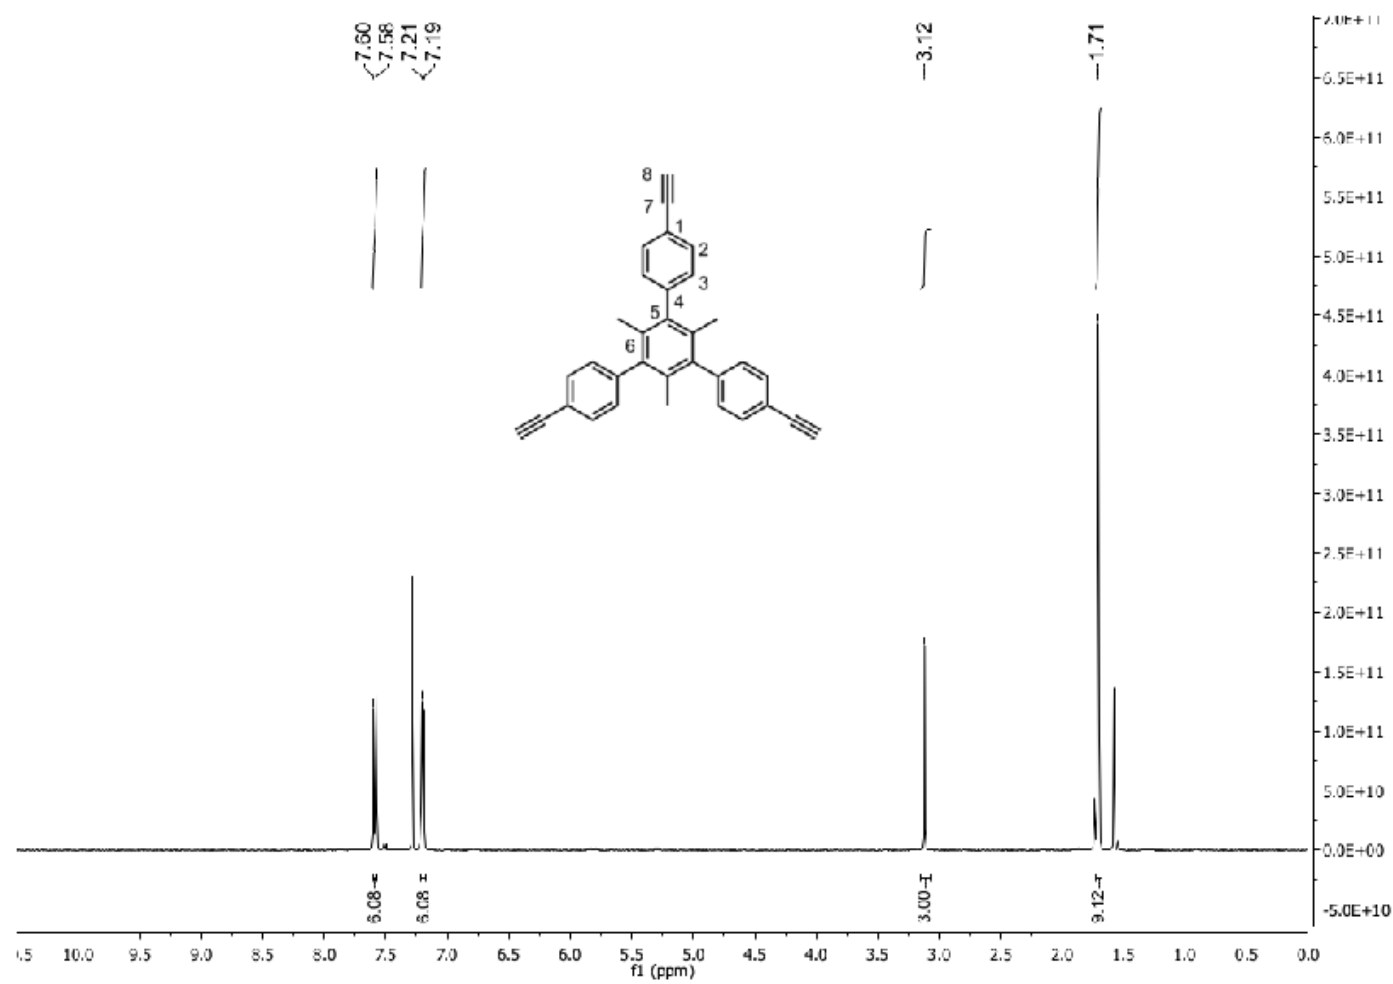

Figure S15 – The  $^1\text{H}$  NMR spectrum of **10**, measured in  $\text{CDCl}_3$ .

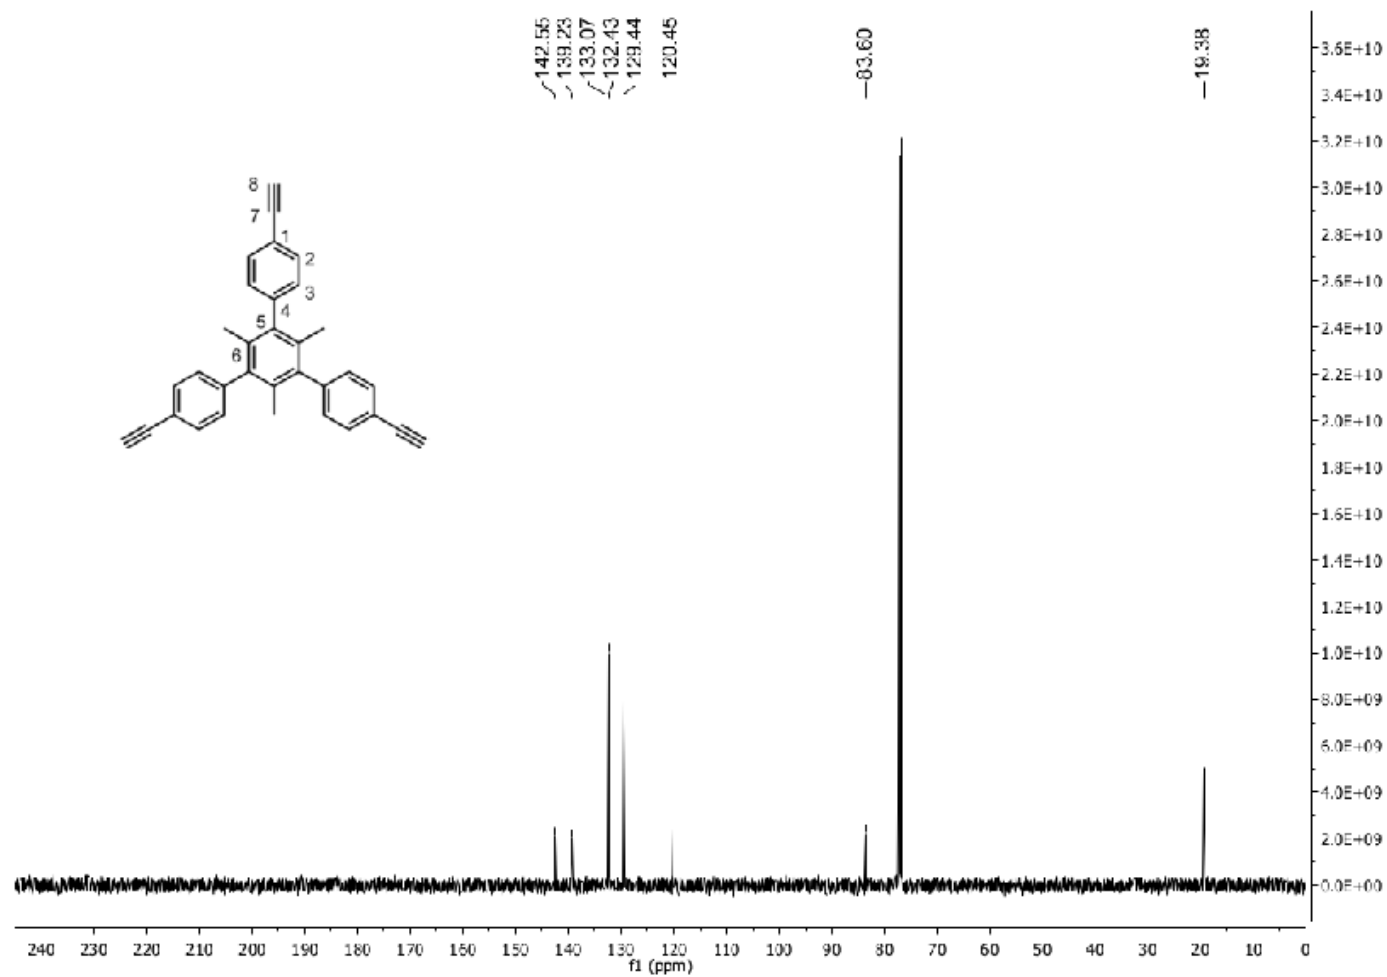

Figure S16 – The <sup>13</sup>C NMR spectrum of **10**, measured in CDCl<sub>3</sub>.

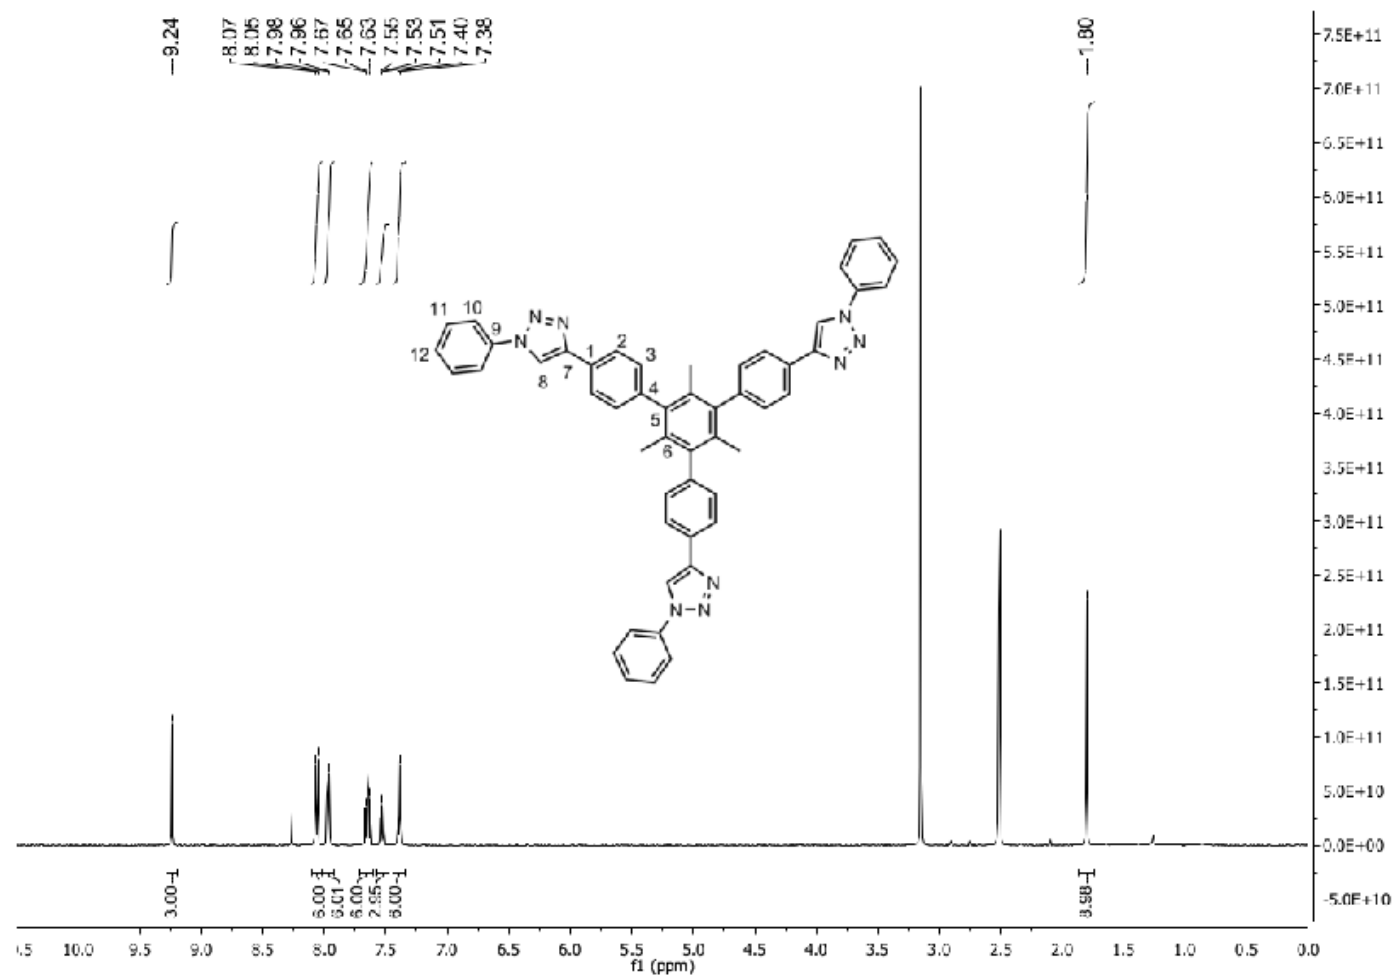

Figure S17 – The <sup>1</sup>H NMR spectrum of **11**, measured in DMSO-*d*<sub>6</sub>.

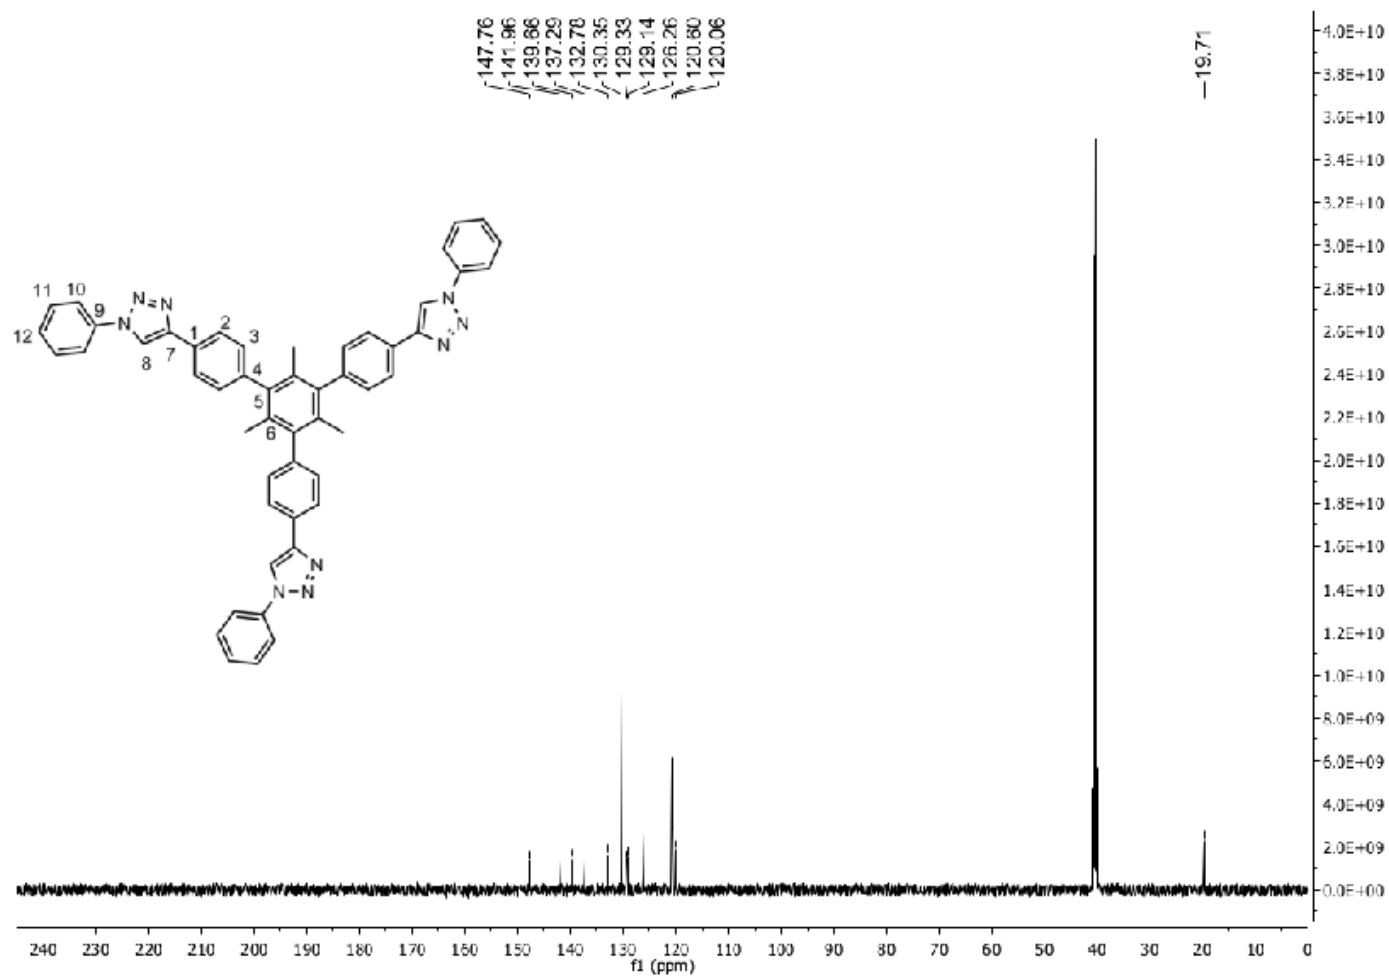

Figure S18 – The  $^{13}\text{C}$  NMR spectrum of **11**, measured in  $\text{DMSO}-d_6$ .

## EI-MS Spectra

3CN #996 RT: 3.42 AV: 1 NL: 3.19E7  
T: + c EI Full ms [100.00-950.00]

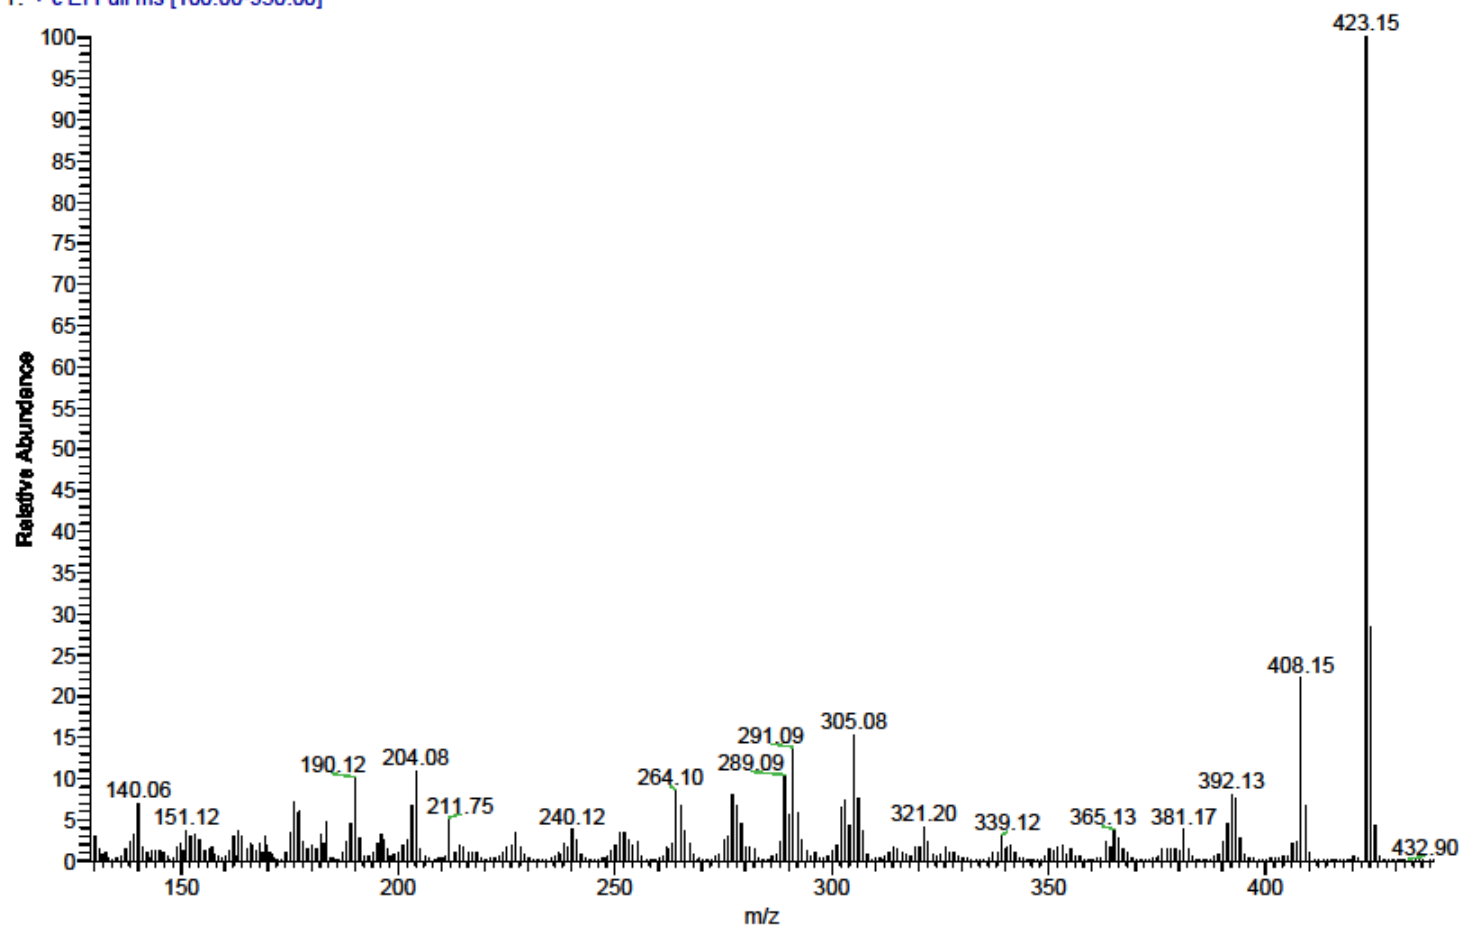

Figure S19 – The EI-MS spectrum of 2.

3TTR #1201 RT: 4.12 AV: 1 NL: 2.27E4  
T: + c EI Full ms [100.00-950.00]

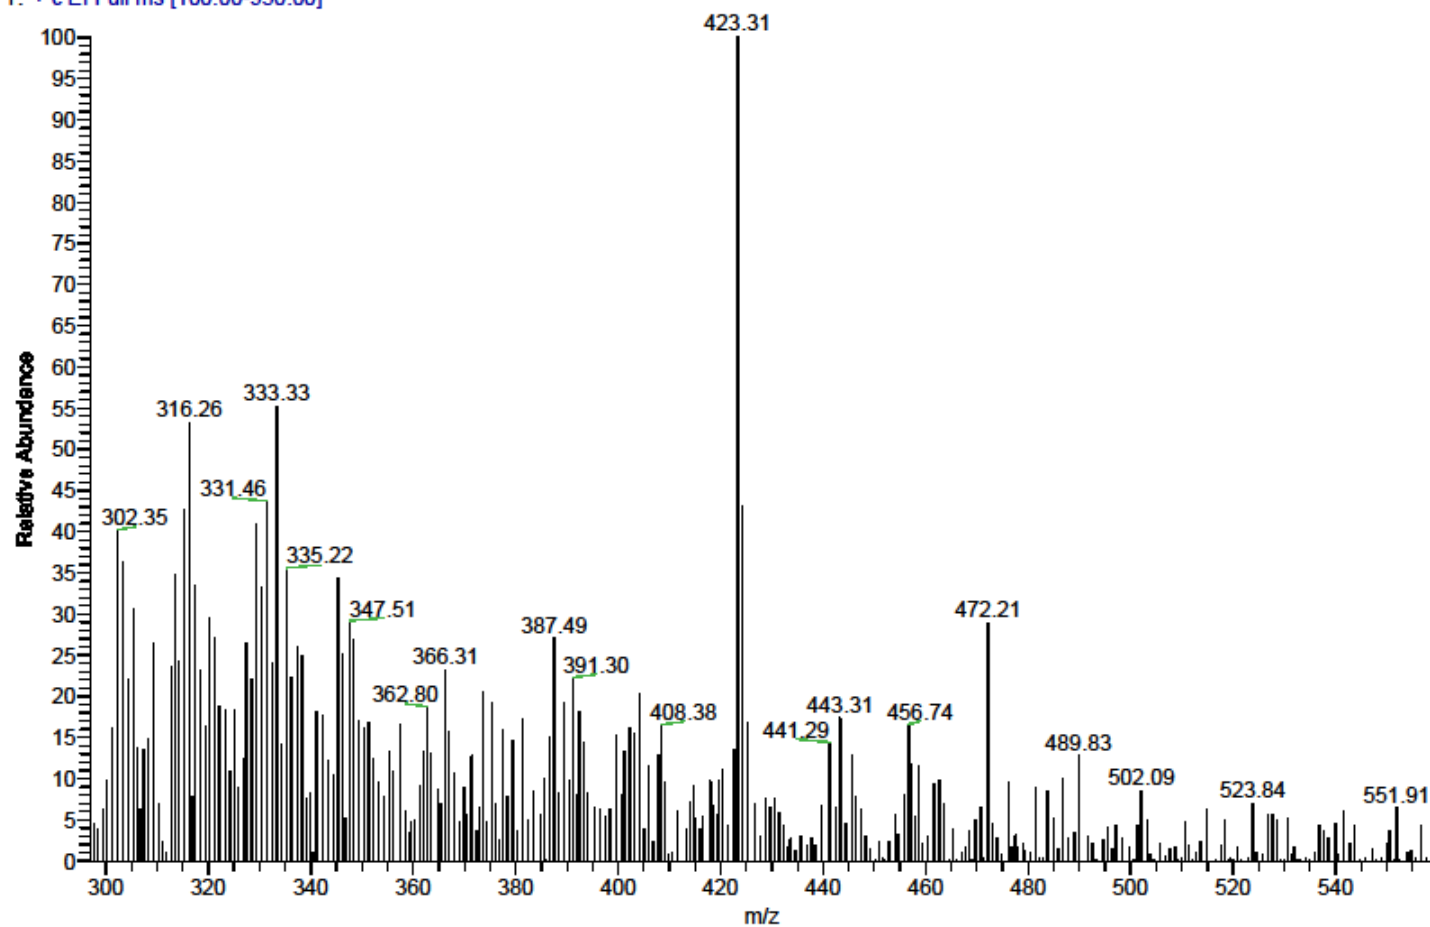

Figure S20 - The EI-MS spectrum of **3**.



3acPhCN #1069-1334 RT: 3.67-4.57 AV: 266 NL: 2.98E5  
T: + c EI Full ms [100.00-950.00]

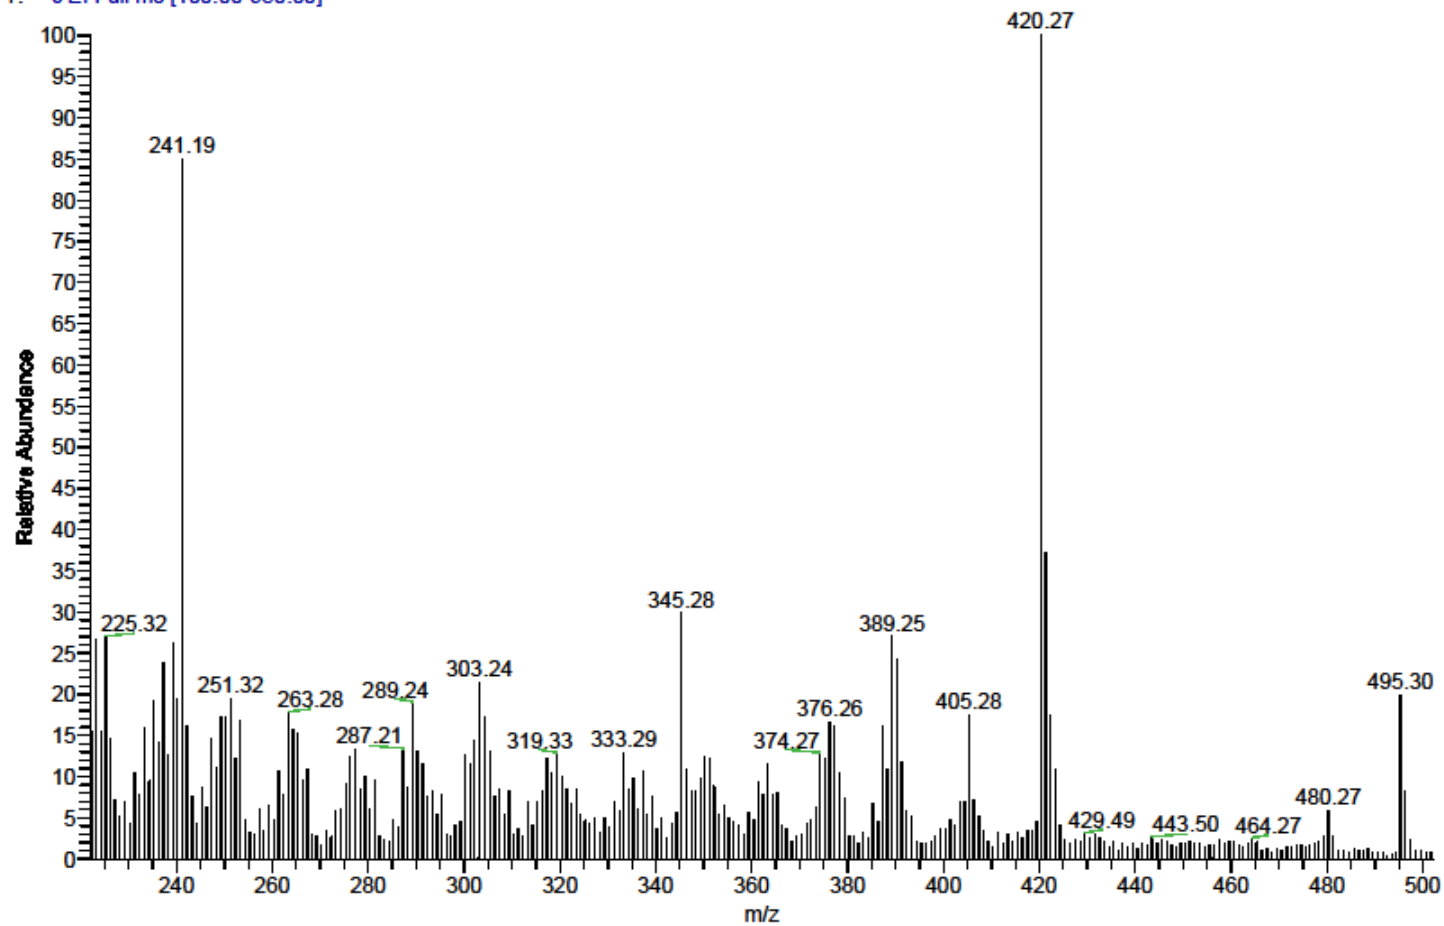

Figure S21 - The EI-MS spectrum of 4.

3acPhCN #1330 RT: 4.55 AV: 1 NL: 1.59E3  
T: + c EI Full ms [100.00-950.00]

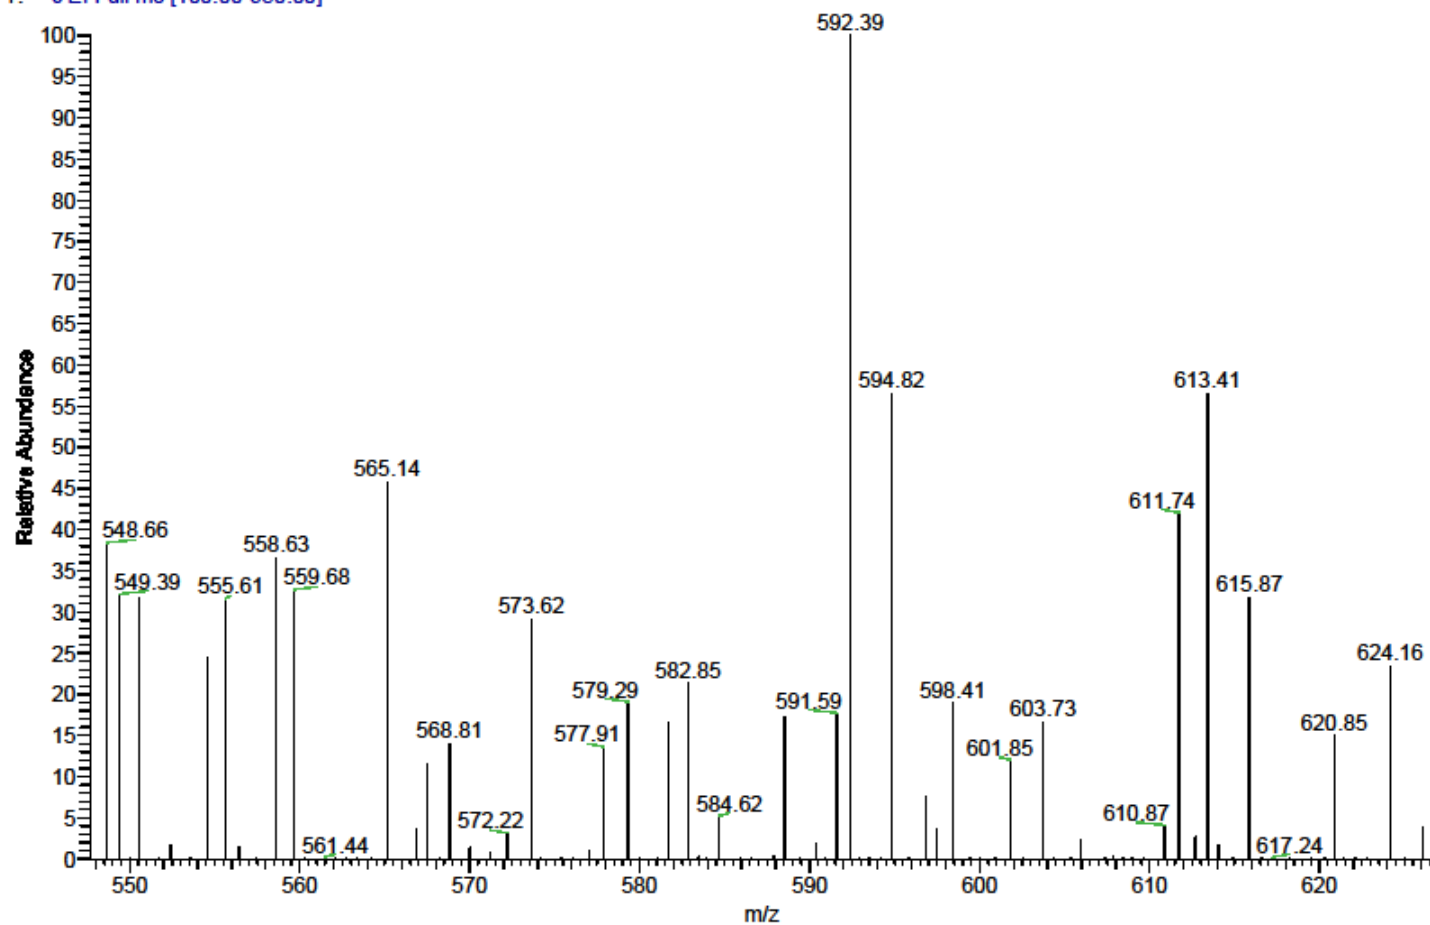

Figure S22 - The EI-MS spectrum of **5**.

3etPhTTR #1192 RT: 4.09 AV: 1 NL: 3.29E5  
T: + c EI Full ms [100.00-950.00]

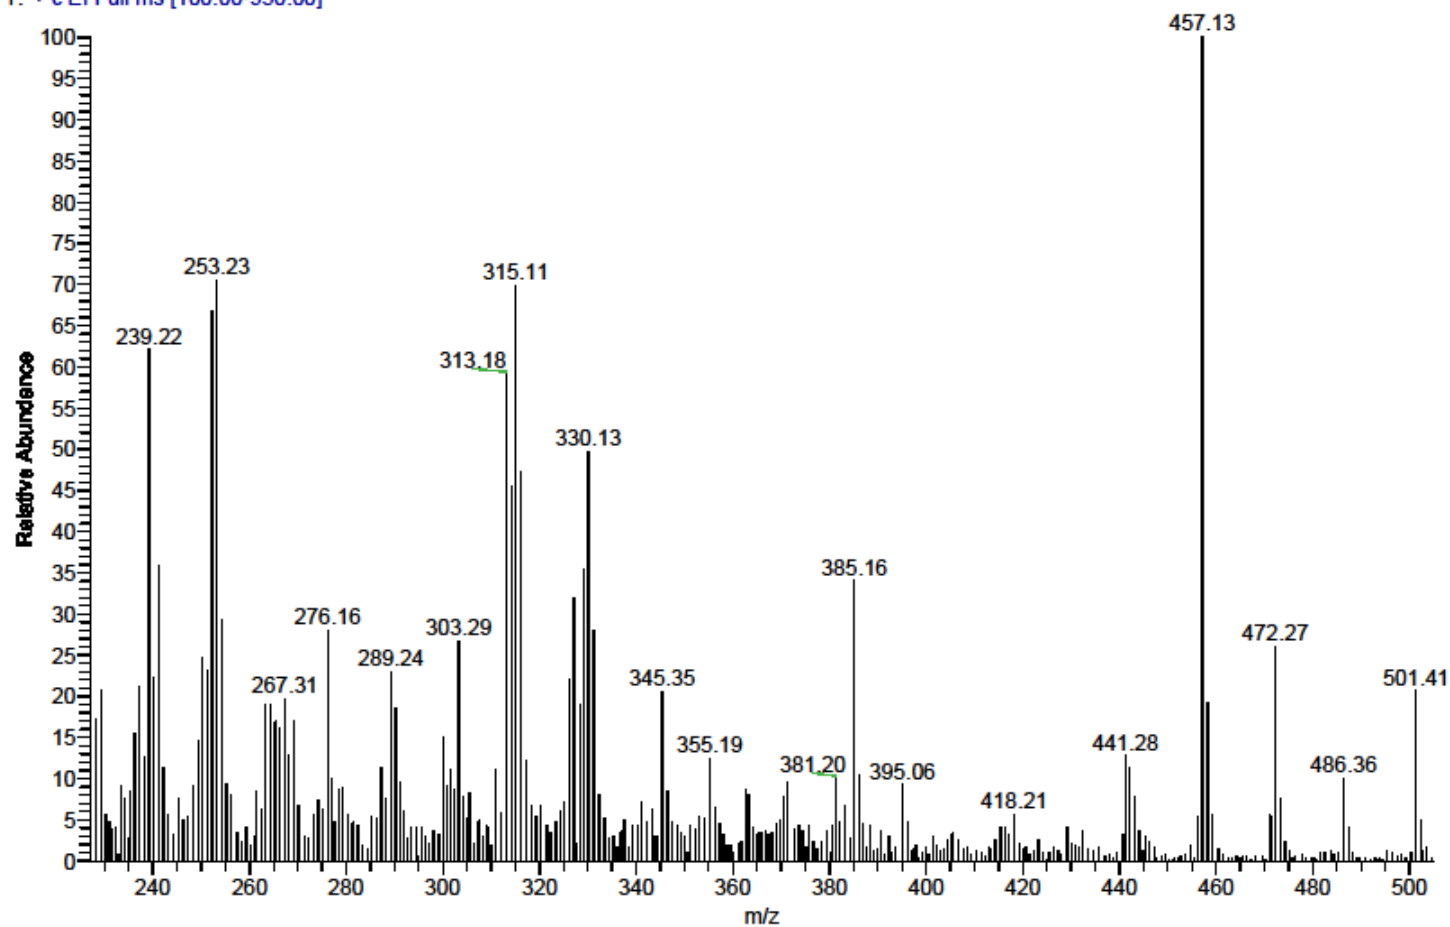

Figure S23 - The EI-MS spectrum of **6**.

3etPhTTR #1269 RT: 4.35 AV: 1 NL: 1.12E4  
T: + c EI Full ms [100.00-950.00]

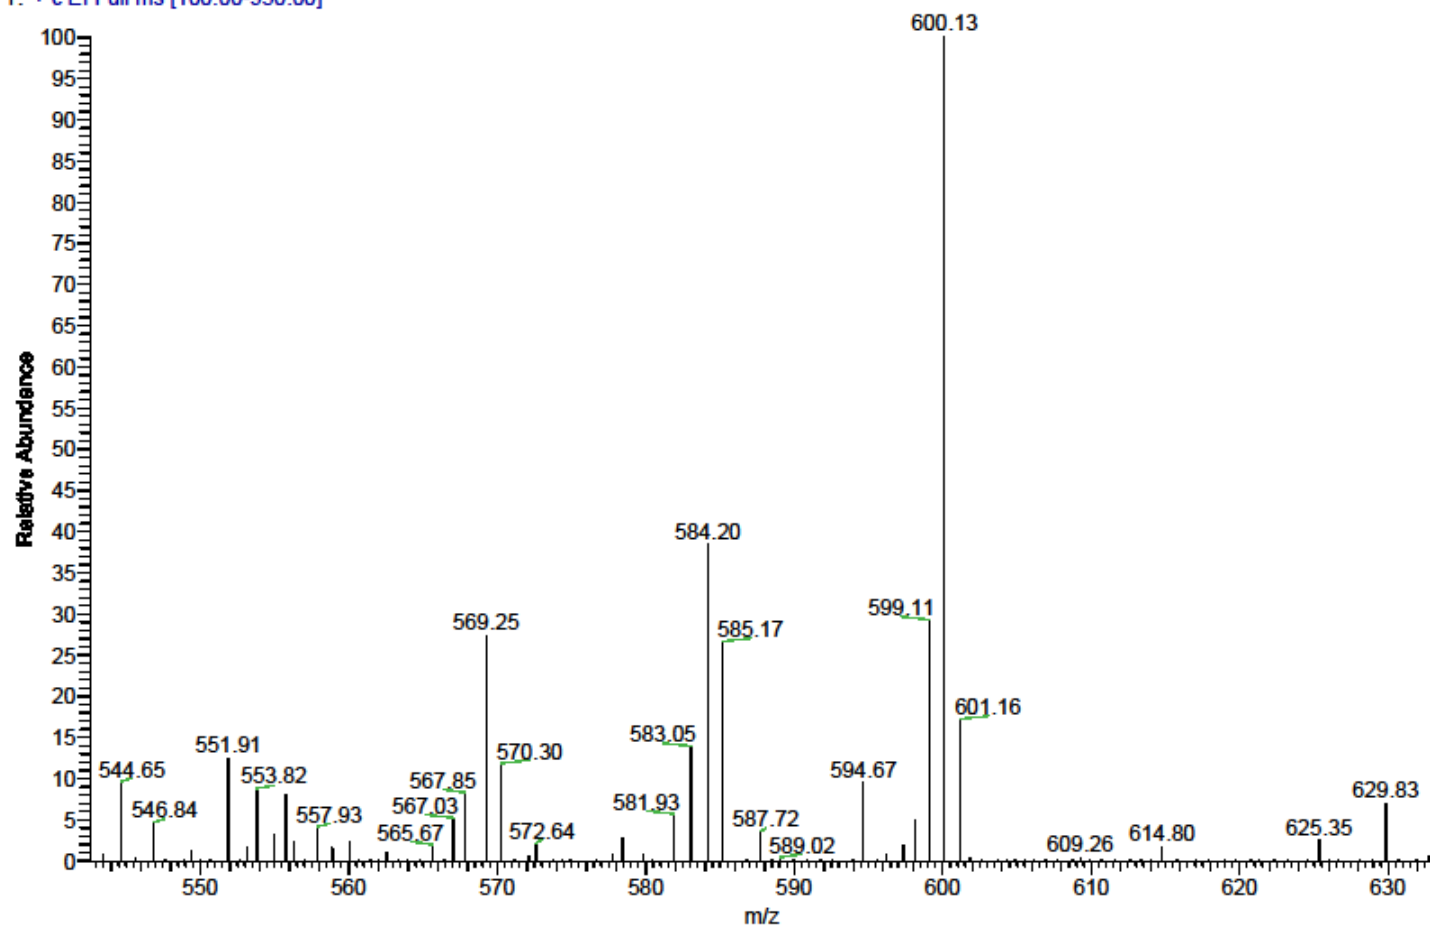

Figure S24 - The EI-MS spectrum of 7.

3CHCBr2\_210729124044 #1335 RT: 4.57 AV: 1 NL: 6.81E3  
T: + c EI Full ms [100.00-950.00]

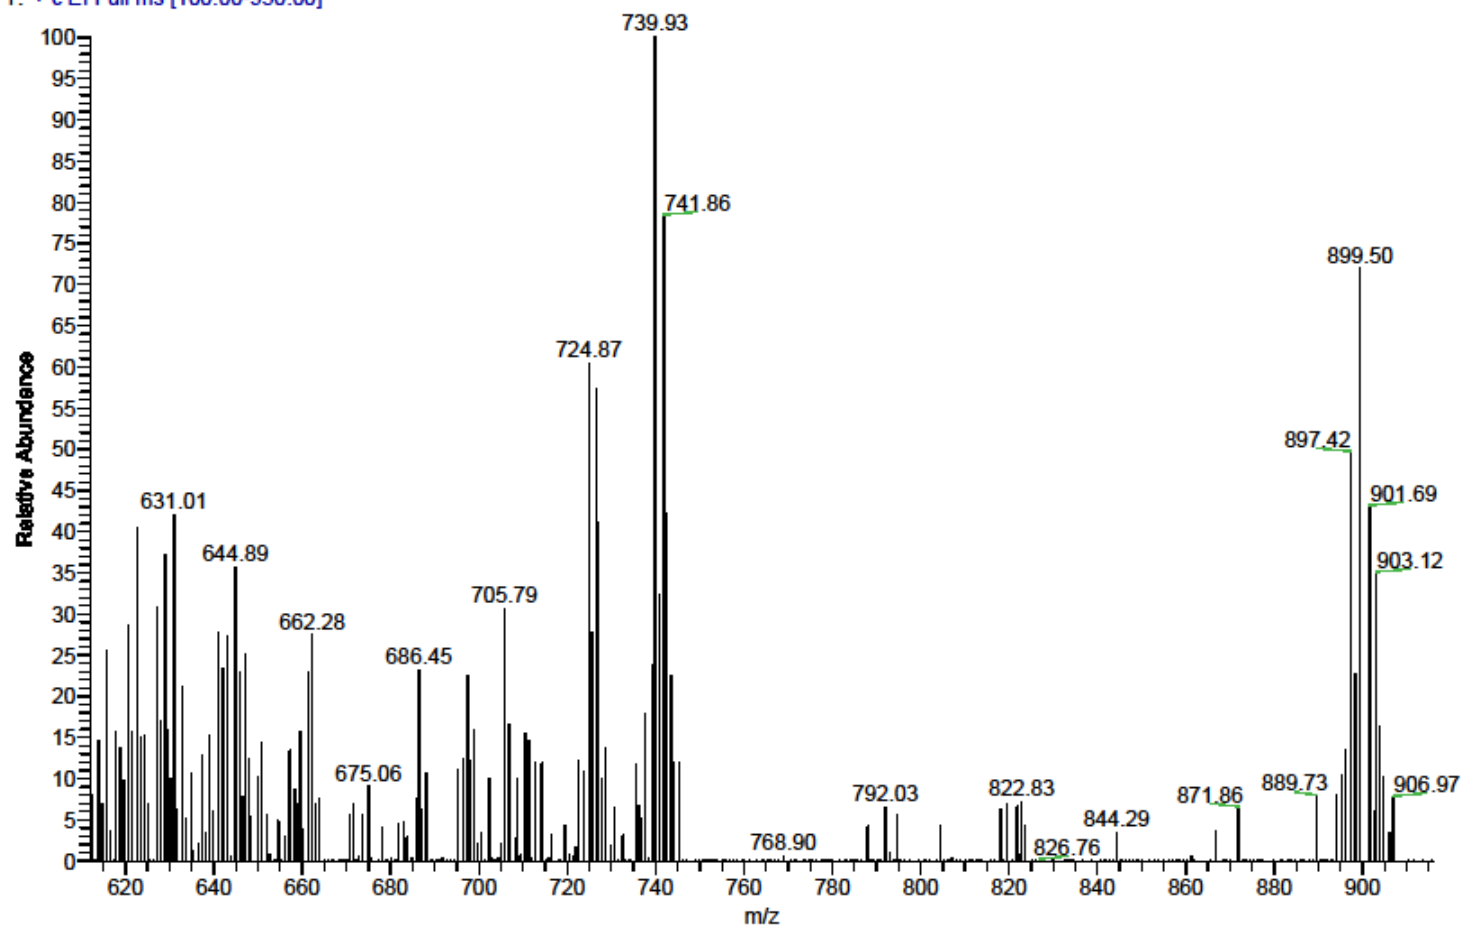

Figure S25 - The EI-MS spectrum of **9**.

3— #1156 RT: 3.96 AV: 1 NL: 1.14E7  
T: + c EI Full ms [100.00-950.00]

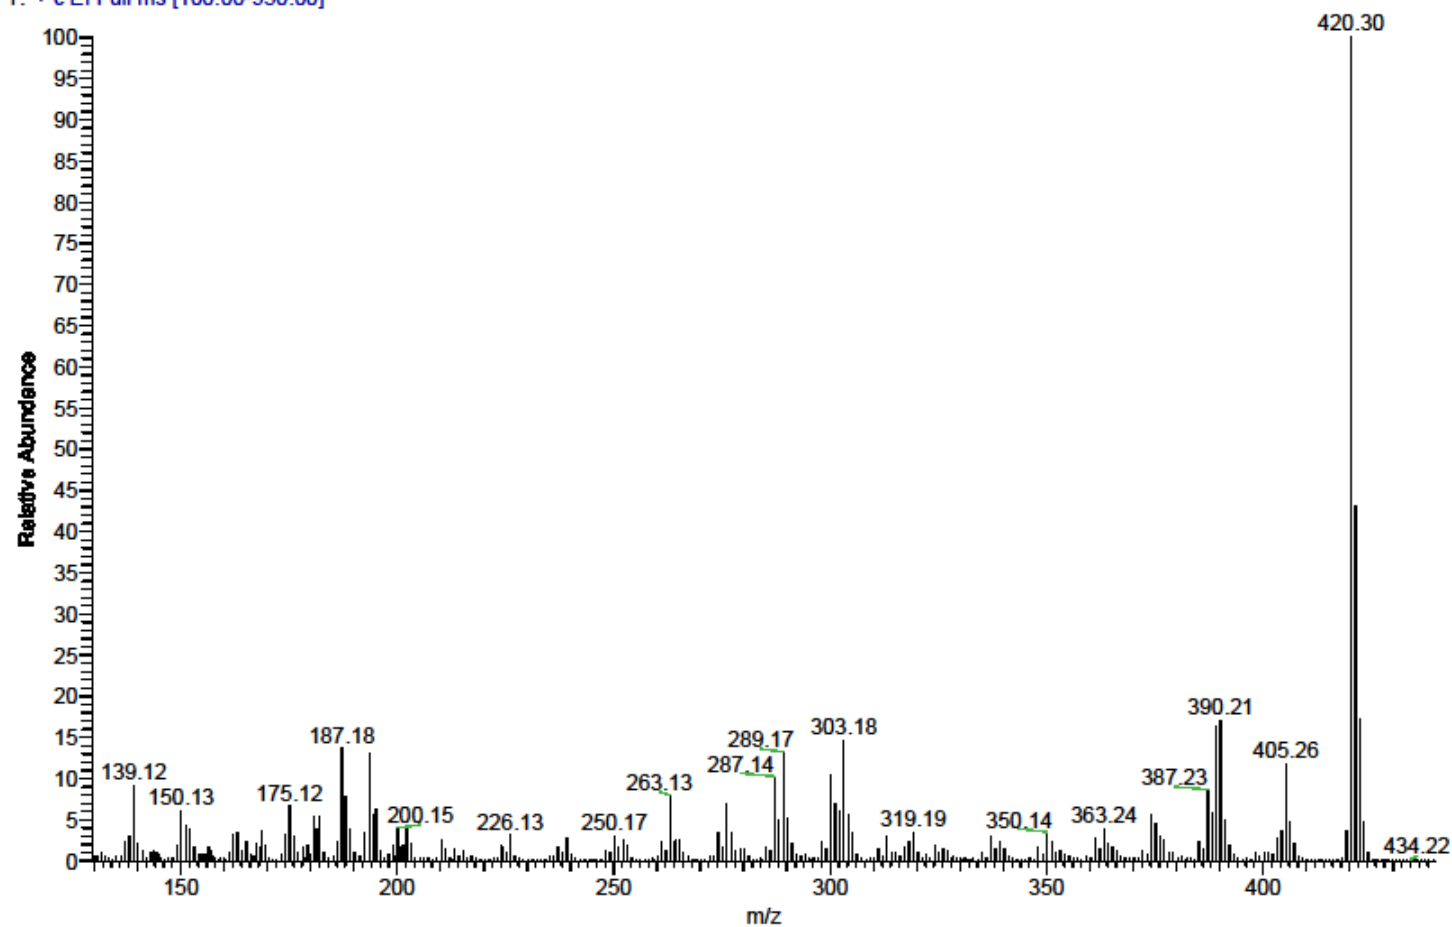

Figure S26 - The EI-MS spectrum of **10**.

3TRZPh #856 RT: 2.94 AV: 1 NL: 1.44E3  
T: + c EI Full ms [100.00-950.00]

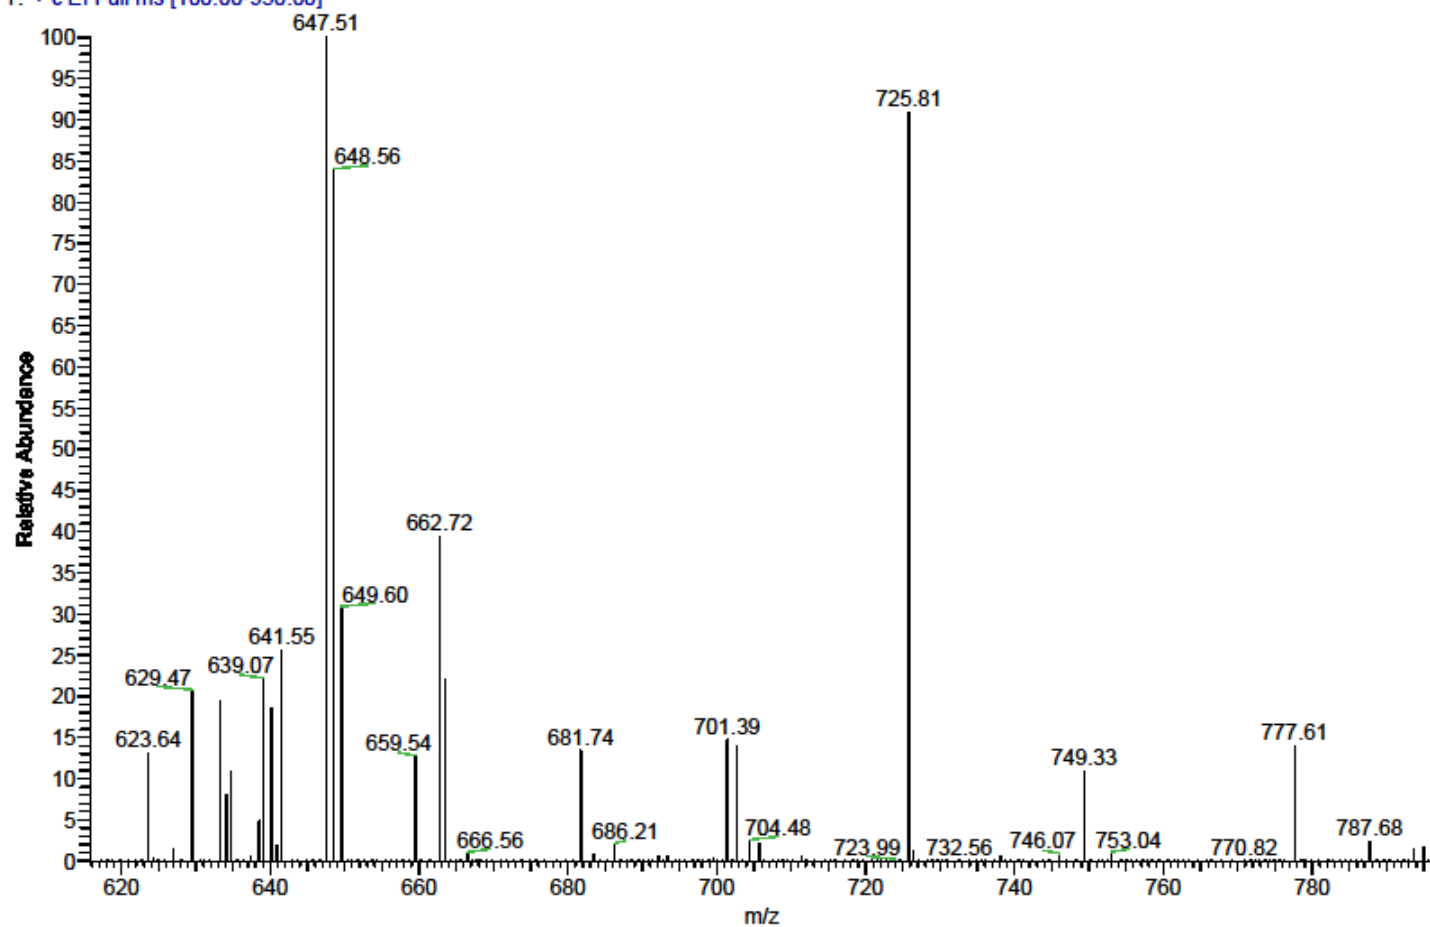

Figure S27 - The EI-MS spectrum of **11**.

## X-ray crystallography

**Table S1:** Crystal data and details of data collection

| Parameter                                       | <b>2</b>                                                            | <b>9</b>                                                            | <b>10</b>                               | <b>12</b>                                                                                      |
|-------------------------------------------------|---------------------------------------------------------------------|---------------------------------------------------------------------|-----------------------------------------|------------------------------------------------------------------------------------------------|
| empirical formula                               | C <sub>30</sub> H <sub>23.25</sub> N <sub>3</sub> O <sub>1.13</sub> | C <sub>33</sub> H <sub>26.75</sub> Br <sub>6</sub> O <sub>1.5</sub> | C <sub>33</sub> H <sub>24</sub>         | C <sub>55.5</sub> H <sub>46</sub> Ag <sub>2</sub> F <sub>6</sub> N <sub>3</sub> O <sub>4</sub> |
| <i>F</i> <sub>w</sub>                           | 443.76                                                              | 926.75                                                              | 420.52                                  | 1148.69                                                                                        |
| space group                                     | <i>P</i> 2 <sub>1</sub> / <i>c</i>                                  | <i>P</i> 2 <sub>1</sub> / <i>n</i>                                  | <i>P</i> 2 <sub>1</sub> / <i>c</i>      | <i>C</i> 2/ <i>c</i>                                                                           |
| <i>a</i> [Å]                                    | 12.0041(12)                                                         | 20.0818(18)                                                         | 12.0152(19)                             | 28.8519(7)                                                                                     |
| <i>b</i> [Å]                                    | 8.3857(4)                                                           | 7.8589(6)                                                           | 8.6661(15)                              | 18.1939(5)                                                                                     |
| <i>c</i> [Å]                                    | 30.145(3)                                                           | 21.949(2)                                                           | 24.388(3)                               | 19.6865(7)                                                                                     |
| $\beta$ [°]                                     | 122.388(13)                                                         | 97.147(10)                                                          | 97.910(14)                              | 96.354(5)                                                                                      |
| <i>V</i> [Å <sup>3</sup> ]                      | 2562.5(5)                                                           | 3437.1(5)                                                           | 2515.3(7)                               | 10270.5(5)                                                                                     |
| <i>Z</i>                                        | 4                                                                   | 4                                                                   | 4                                       | 8                                                                                              |
| <i>r</i> <sub>calcd</sub> [g·cm <sup>-3</sup> ] | 1.150                                                               | 1.791                                                               | 1.110                                   | 1.486                                                                                          |
| Crystal size [mm]                               | 0.20 × 0.05 × 0.05                                                  | 0.35 × 0.18 × 0.04                                                  | 0.35 × 0.10 × 0.05                      | 0.45 × 0.30 × 0.03                                                                             |
| <i>T</i> [K]                                    | 180                                                                 | 297                                                                 | 293                                     | 180                                                                                            |
| $\mu$ [mm <sup>-1</sup> ]                       | 0.071                                                               | 7.034                                                               | 0.063                                   | 0.832                                                                                          |
| 2 $\theta$ range [°]                            | 3.2 to 50.052                                                       | 5.51 to 50.054                                                      | 4.462 to 50.054                         | 3.272 to 57.552                                                                                |
| Reflections collected                           | 16471                                                               | 14360                                                               | 9944                                    | 23210                                                                                          |
| Independent reflections                         | 4503 [ <i>R</i> <sub>int</sub> =0.0450]                             | 6050 [ <i>R</i> <sub>int</sub> =0.1057]                             | 4446 [ <i>R</i> <sub>int</sub> =0.0564] | 11697 [ <i>R</i> <sub>int</sub> =0.0356]                                                       |
| Data/restraints/parameter                       | 4503/0/333                                                          | 6050/0/332                                                          | 4446/0/301                              | 11697/54/655                                                                                   |
| <i>R</i> <sub>1</sub> <sup>[a]</sup>            | 0.0670                                                              | 0.0870                                                              | 0.0764                                  | 0.0539                                                                                         |
| <i>wR</i> <sub>2</sub> <sup>[b]</sup>           | 0.1827                                                              | 0.2768                                                              | 0.2225                                  | 0.1137                                                                                         |
| GOF <sup>[c]</sup>                              | 1.027                                                               | 0.999                                                               | 1.004                                   | 1.024                                                                                          |
| Largest diff. peak/hole / e                     | 0.44/-0.24                                                          | 1.78/-1.28                                                          | 0.20/-0.15                              | 0.69/-0.84                                                                                     |
| CCDC No.                                        | 2099115                                                             | 2099116                                                             | 2099117                                 | 2106774                                                                                        |

<sup>a</sup>  $R_1 = \sum ||F_o| - |F_c|| / \sum |F_o|$ . <sup>b</sup>  $wR_2 = \{ \sum [w(F_o^2 - F_c^2)^2] / \sum [w(F_o^2)^2] \}^{1/2}$ . <sup>c</sup> GOF =  $\{ \sum [w(F_o^2 - F_c^2)^2] / (n - p) \}^{1/2}$ , where *n* is the number of

reflections and *p* is the total number of parameters refined.



## Bond distances (Å) and angles(°)

Table S2. Bond distances (Å) for **2**

|         |          |         |          |
|---------|----------|---------|----------|
| N1-C1   | 1.147(4) | C11-C16 | 1.509(4) |
| N2-C23  | 1.144(3) | C12-C13 | 1.404(3) |
| N3-C30  | 1.143(4) | C12-C24 | 1.498(3) |
| C1-C2   | 1.447(4) | C13-C14 | 1.516(3) |
| C2-C3   | 1.384(4) | C17-C18 | 1.376(4) |
| C2-C7   | 1.381(4) | C17-C22 | 1.377(4) |
| C3-C4   | 1.391(4) | C18-C19 | 1.388(4) |
| C4-C5   | 1.394(3) | C19-C20 | 1.381(4) |
| C5-C6   | 1.383(4) | C20-C21 | 1.365(4) |
| C5-C8   | 1.501(3) | C20-C23 | 1.445(4) |
| C6-C7   | 1.379(4) | C21-C22 | 1.377(4) |
| C8-C9   | 1.401(3) | C24-C25 | 1.390(3) |
| C8-C13  | 1.400(3) | C24-C29 | 1.388(4) |
| C9-C10  | 1.402(4) | C25-C26 | 1.380(4) |
| C9-C15  | 1.510(4) | C26-C27 | 1.381(4) |
| C10-C11 | 1.408(3) | C27-C28 | 1.385(4) |
| C10-C17 | 1.502(3) | C27-C30 | 1.442(4) |
| C11-C12 | 1.404(3) | C28-C29 | 1.381(4) |

Table S3. Bond angles(°) for **2**

|          |          |             |          |
|----------|----------|-------------|----------|
| N1-C1-C2 | 178.0(3) | C8-C13-C12  | 119.7(2) |
| C3-C2-C1 | 120.4(3) | C8-C13-C14  | 120.2(2) |
| C7-C2-C1 | 119.5(3) | C12-C13-C14 | 120.1(2) |
| C7-C2-C3 | 120.1(2) | C18-C17-C10 | 122.9(2) |
| C2-C3-C4 | 119.7(3) | C18-C17-C22 | 117.8(2) |

|             |          |             |          |
|-------------|----------|-------------|----------|
| C3-C4-C5    | 120.7(3) | C22-C17-C10 | 119.3(2) |
| C4-C5-C8    | 120.6(2) | C17-C18-C19 | 120.8(3) |
| C6-C5-C4    | 118.1(2) | C20-C19-C18 | 120.0(3) |
| C6-C5-C8    | 121.3(2) | C19-C20-C23 | 122.0(3) |
| C7-C6-C5    | 121.8(2) | C21-C20-C19 | 119.4(2) |
| C6-C7-C2    | 119.6(3) | C21-C20-C23 | 118.5(2) |
| C9-C8-C5    | 120.7(2) | C20-C21-C22 | 119.9(3) |
| C13-C8-C5   | 118.5(2) | C17-C22-C21 | 121.9(3) |
| C13-C8-C9   | 120.8(2) | N2-C23-C20  | 176.6(3) |
| C8-C9-C10   | 118.9(2) | C25-C24-C12 | 122.0(2) |
| C8-C9-C15   | 120.7(2) | C29-C24-C12 | 120.0(2) |
| C10-C9-C15  | 120.4(2) | C29-C24-C25 | 118.1(2) |
| C9-C10-C11  | 121.1(2) | C26-C25-C24 | 121.4(3) |
| C9-C10-C17  | 120.5(2) | C25-C26-C27 | 119.6(3) |
| C11-C10-C17 | 118.2(2) | C26-C27-C28 | 120.1(2) |
| C10-C11-C16 | 120.5(2) | C26-C27-C30 | 121.0(3) |
| C12-C11-C10 | 119.0(2) | C28-C27-C30 | 118.8(3) |
| C12-C11-C16 | 120.6(2) | C29-C28-C27 | 119.7(3) |
| C11-C12-C24 | 120.3(2) | C28-C29-C24 | 121.1(3) |
| C13-C12-C11 | 120.4(2) | N3-C30-C27  | 178.1(5) |
| C13-C12-C24 | 119.3(2) |             |          |

Table S4. Bond distances (Å) for **9**

|         |           |         |           |
|---------|-----------|---------|-----------|
| Br1-C1  | 1.897(10) | C12-C11 | 1.406(13) |
| Br2-C1  | 1.802(13) | C12-C17 | 1.528(14) |
| Br3-C25 | 1.883(12) | C11-C10 | 1.381(14) |
| Br4-C25 | 1.886(13) | C11-C26 | 1.523(10) |
| Br5-C33 | 1.882(13) | C10-C16 | 1.537(14) |
| Br6-C33 | 1.879(10) | C21-C24 | 1.490(11) |

|         |           |         |           |
|---------|-----------|---------|-----------|
| C1-C2   | 1.305(15) | C21-C20 | 1.3900    |
| C2-C3   | 1.489(13) | C21-C22 | 1.3900    |
| C8-C3   | 1.3900    | C20-C19 | 1.3900    |
| C8-C7   | 1.3900    | C19-C18 | 1.3900    |
| C3-C4   | 1.3900    | C18-C23 | 1.3900    |
| C4-C5   | 1.3900    | C23-C22 | 1.3900    |
| C5-C6   | 1.3900    | C24-C25 | 1.307(15) |
| C6-C7   | 1.3900    | C29-C32 | 1.460(11) |
| C6-C9   | 1.514(10) | C27-C28 | 1.3900    |
| C9-C14  | 1.362(13) | C27-C26 | 1.3900    |
| C9-C10  | 1.424(14) | C28-C29 | 1.3900    |
| C14-C13 | 1.448(14) | C29-C30 | 1.3900    |
| C14-C15 | 1.506(14) | C30-C31 | 1.3900    |
| C13-C12 | 1.395(14) | C31-C26 | 1.3900    |
| C13-C18 | 1.514(11) | C32-C33 | 1.322(14) |

Table S5. Bond angles(°) for **9**

|            |           |             |           |
|------------|-----------|-------------|-----------|
| Br2-C1-Br1 | 111.6(7)  | C11-C10-C9  | 120.5(9)  |
| C2-C1-Br1  | 120.5(10) | C11-C10-C16 | 119.5(10) |
| C2-C1-Br2  | 127.5(9)  | C20-C21-C22 | 120.0     |
| C1-C2-C3   | 132.4(11) | C20-C21-C24 | 115.6(7)  |
| C3-C8-C7   | 120.0     | C22-C21-C24 | 124.3(7)  |
| C8-C3-C2   | 124.0(6)  | C19-C20-C21 | 120.0     |
| C4-C3-C2   | 115.9(6)  | C20-C19-C18 | 120.0     |
| C4-C3-C8   | 120.0     | C19-C18-C13 | 119.2(6)  |
| C3-C4-C5   | 120.0     | C19-C18-C23 | 120.0     |
| C4-C5-C6   | 120.0     | C23-C18-C13 | 120.7(6)  |
| C5-C6-C9   | 121.9(6)  | C18-C23-C22 | 120.0     |

|             |           |             |           |
|-------------|-----------|-------------|-----------|
| C7-C6-C5    | 120.0     | C23-C22-C21 | 120.0     |
| C7-C6-C9    | 118.0(6)  | C25-C24-C21 | 133.1(11) |
| C6-C7-C8    | 120.0     | Br3-C25-Br4 | 111.9(7)  |
| C14-C9-C6   | 119.3(8)  | C24-C25-Br3 | 122.0(10) |
| C14-C9-C10  | 120.9(9)  | C24-C25-Br4 | 126.1(10) |
| C10-C9-C6   | 119.8(8)  | C28-C27-C26 | 120.0     |
| C9-C14-C13  | 118.7(9)  | C29-C28-C27 | 120.0     |
| C9-C14-C15  | 122.5(10) | C28-C29-C30 | 120.0     |
| C13-C14-C15 | 118.8(9)  | C28-C29-C32 | 115.6(6)  |
| C14-C13-C18 | 119.0(8)  | C30-C29-C32 | 124.4(6)  |
| C12-C13-C14 | 120.1(9)  | C31-C30-C29 | 120.0     |
| C12-C13-C18 | 120.9(9)  | C30-C31-C26 | 120.0     |
| C13-C12-C11 | 119.9(9)  | C27-C26-C11 | 119.0(6)  |
| C13-C12-C17 | 119.8(9)  | C31-C26-C11 | 120.5(5)  |
| C11-C12-C17 | 120.4(9)  | C31-C26-C27 | 120.0     |
| C12-C11-C26 | 118.8(8)  | C33-C32-C29 | 133.1(10) |
| C10-C11-C12 | 119.9(9)  | Br6-C33-Br5 | 112.8(6)  |
| C10-C11-C26 | 121.3(8)  | C32-C33-Br5 | 124.8(9)  |
| C9-C10-C16  | 120.0(9)  | C32-C33-Br6 | 122.4(10) |

Table S6. Bond distances (Å) for **10**

|       |          |         |          |
|-------|----------|---------|----------|
| C1-C2 | 1.152(5) | C13-C26 | 1.492(5) |
| C2-C3 | 1.446(6) | C14-C15 | 1.515(5) |
| C3-C4 | 1.391(5) | C18-C19 | 1.369(6) |
| C3-C8 | 1.380(6) | C18-C23 | 1.391(5) |
| C4-C5 | 1.379(5) | C19-C20 | 1.389(6) |
| C5-C6 | 1.366(5) | C20-C21 | 1.379(5) |
| C6-C7 | 1.380(5) | C21-C22 | 1.375(6) |
| C6-C9 | 1.501(5) | C21-C24 | 1.420(6) |

|         |          |         |          |
|---------|----------|---------|----------|
| C7-C8   | 1.371(5) | C22-C23 | 1.383(6) |
| C9-C10  | 1.388(5) | C24-C25 | 1.131(7) |
| C9-C14  | 1.400(5) | C26-C27 | 1.373(5) |
| C10-C11 | 1.400(5) | C26-C31 | 1.383(5) |
| C10-C16 | 1.528(5) | C27-C28 | 1.389(6) |
| C11-C12 | 1.408(5) | C28-C29 | 1.372(6) |
| C11-C18 | 1.474(5) | C29-C30 | 1.372(6) |
| C12-C13 | 1.390(5) | C29-C32 | 1.432(6) |
| C12-C17 | 1.515(5) | C30-C31 | 1.377(5) |
| C13-C14 | 1.390(5) | C32-C33 | 1.145(6) |

Table S7. Bond angles(°) for **10**

|             |          |             |          |
|-------------|----------|-------------|----------|
| C1-C2-C3    | 176.1(6) | C9-C14-C15  | 120.2(4) |
| C4-C3-C2    | 121.0(4) | C13-C14-C9  | 120.0(4) |
| C8-C3-C2    | 120.7(4) | C13-C14-C15 | 119.8(4) |
| C8-C3-C4    | 118.3(4) | C19-C18-C11 | 121.2(4) |
| C5-C4-C3    | 119.1(4) | C19-C18-C23 | 116.4(5) |
| C6-C5-C4    | 122.8(4) | C23-C18-C11 | 122.3(5) |
| C5-C6-C7    | 117.6(4) | C18-C19-C20 | 122.1(4) |
| C5-C6-C9    | 121.5(3) | C21-C20-C19 | 121.3(5) |
| C7-C6-C9    | 120.8(4) | C20-C21-C24 | 120.6(6) |
| C8-C7-C6    | 120.7(4) | C22-C21-C20 | 116.9(5) |
| C7-C8-C3    | 121.4(4) | C22-C21-C24 | 122.5(5) |
| C10-C9-C6   | 119.7(4) | C21-C22-C23 | 121.8(4) |
| C10-C9-C14  | 120.2(4) | C22-C23-C18 | 121.5(5) |
| C14-C9-C6   | 120.1(4) | C25-C24-C21 | 177.4(8) |
| C9-C10-C11  | 120.1(4) | C27-C26-C13 | 120.2(4) |
| C9-C10-C16  | 120.4(4) | C27-C26-C31 | 117.2(4) |
| C11-C10-C16 | 119.5(4) | C31-C26-C13 | 122.6(4) |

|             |          |             |          |
|-------------|----------|-------------|----------|
| C10-C11-C12 | 119.5(4) | C26-C27-C28 | 121.9(4) |
| C10-C11-C18 | 120.0(4) | C29-C28-C27 | 120.4(4) |
| C12-C11-C18 | 120.5(4) | C28-C29-C32 | 120.7(5) |
| C11-C12-C17 | 119.1(4) | C30-C29-C28 | 117.9(4) |
| C13-C12-C11 | 120.1(4) | C30-C29-C32 | 121.4(4) |
| C13-C12-C17 | 120.8(4) | C29-C30-C31 | 121.8(4) |
| C12-C13-C26 | 119.7(4) | C30-C31-C26 | 120.8(4) |
| C14-C13-C12 | 120.1(4) | C33-C32-C29 | 177.3(6) |
| C14-C13-C26 | 120.1(4) |             |          |

Table S8. Bond distances (Å) for **12**

|                     |          |         |          |                      |           |
|---------------------|----------|---------|----------|----------------------|-----------|
| Ag1-O2              | 2.239(3) | C12-C17 | 1.401(6) | C41-C43 <sup>4</sup> | 1.352(7)  |
| Ag1-O4              | 2.289(4) | C13-C14 | 1.406(5) | C42-C43              | 1.328(7)  |
| Ag1-N1              | 2.338(4) | C13-C20 | 1.511(6) | C44-C45              | 1.443(9)  |
| Ag1-N3 <sup>1</sup> | 2.274(4) | C14-C15 | 1.398(6) | C45-C46              | 1.362(9)  |
| Ag2-O1              | 2.281(3) | C14-C33 | 1.491(6) | C45-C50              | 1.388(10) |
| Ag2-O3              | 2.219(3) | C15-C16 | 1.399(6) | C46-C47              | 1.375(9)  |
| Ag2-N2 <sup>2</sup> | 2.343(4) | C15-C19 | 1.514(5) | C47-C48              | 1.385(11) |
| F1-C2               | 1.310(6) | C16-C17 | 1.405(5) | C48-C49              | 1.384(13) |
| F2-C2               | 1.315(5) | C16-C26 | 1.500(5) | C49-C50              | 1.319(10) |
| F3-C2               | 1.317(5) | C17-C18 | 1.509(6) | C51-C52              | 1.25(2)   |
| F4-C4               | 1.389(6) | C21-C22 | 1.367(6) | C52-C53 <sup>5</sup> | 1.398(8)  |
| F5-C4               | 1.331(7) | C21-C26 | 1.366(6) | C52-C53              | 1.403(9)  |
| F6-C4               | 1.337(6) | C22-C23 | 1.369(6) | C53-C54              | 1.392(9)  |
| O1-C1               | 1.234(5) | C23-C24 | 1.364(6) | C53-C56 <sup>5</sup> | 1.386(8)  |
| O2-C1               | 1.230(5) | C23-C27 | 1.437(6) | C54-C55              | 1.389(9)  |
| O3-C3               | 1.234(5) | C24-C25 | 1.386(6) | C55-C56              | 1.402(10) |
| O4-C3               | 1.234(6) | C25-C26 | 1.373(6) | C57-C58              | 1.47(3)   |
| N1-C5               | 1.142(5) | C28-C29 | 1.374(7) | C58-C59              | 1.46(4)   |

|         |          |                      |            |                      |           |
|---------|----------|----------------------|------------|----------------------|-----------|
| N2-C27  | 1.145(5) | C28-C33              | 1.385(7)   | C58-C60 <sup>3</sup> | 1.77(4)   |
| N3-C34  | 1.126(6) | C29-C30              | 1.367(7)   | C58-C62 <sup>3</sup> | 0.60(3)   |
| C1-C2   | 1.535(6) | C30-C31              | 1.373(6)   | C58-C63              | 1.35(3)   |
| C3-C4   | 1.475(9) | C30-C34              | 1.450(6)   | C59-C60 <sup>3</sup> | 0.57(4)   |
| C5-C6   | 1.432(6) | C31-C32              | 1.377(6)   | C59-C60              | 1.28(4)   |
| C6-C7   | 1.376(7) | C32-C33              | 1.369(6)   | C59-C61 <sup>3</sup> | 1.05(4)   |
| C6-C11  | 1.388(6) | C35-C36 <sup>3</sup> | 1.3892(10) | C60-C61              | 1.39(4)   |
| C7-C8   | 1.386(6) | C35-C36              | 1.3891(10) | C61-C62              | 1.40(3)   |
| C8-C9   | 1.381(6) | C36-C37              | 1.3892(10) | C62-C63              | 1.39(3)   |
| C9-C10  | 1.374(6) | C37-C38              | 1.3898(10) | C62-C63 <sup>3</sup> | 1.39(3)   |
| C9-C12  | 1.495(6) | C38-C39              | 1.329(18)  | C63-C63 <sup>3</sup> | 0.000(16) |
| C10-C11 | 1.388(6) | C40-C41              | 1.438(9)   |                      |           |
| C12-C13 | 1.389(6) | C41-C42              | 1.359(7)   |                      |           |

<sup>1</sup>1/2+X,1/2+Y,+Z; <sup>2</sup>1/2-X,-1/2+Y,1/2-Z; <sup>3</sup>1-X,+Y,1/2-Z; <sup>4</sup>1/2-X,3/2-Y,-Z; <sup>5</sup>1/2-X,3/2-Y,1-Z

Table S9. Bond angles(°) for **12**

|                        |            |             |          |                          |           |
|------------------------|------------|-------------|----------|--------------------------|-----------|
| O2-Ag1-O4              | 122.83(16) | C13-C14-C33 | 118.7(4) | C50-C49-C48              | 121.0(10) |
| O2-Ag1-N1              | 116.39(15) | C15-C14-C13 | 121.0(4) | C49-C50-C45              | 121.4(8)  |
| O2-Ag1-N3 <sup>1</sup> | 115.41(14) | C15-C14-C33 | 120.3(4) | C51-C52-C53 <sup>7</sup> | 121.8(9)  |
| O4-Ag1-N1              | 105.20(15) | C14-C15-C16 | 118.9(4) | C51-C52-C53              | 125.3(8)  |
| N31-Ag1-O4             | 96.99(15)  | C14-C15-C19 | 120.7(4) | C537-C52-C53             | 112.9(14) |
| N31-Ag1-N1             | 95.10(15)  | C16-C15-C19 | 120.3(4) | C527-C53-C52             | 67.1(14)  |
| O1-Ag2-N2 <sup>2</sup> | 96.30(13)  | C15-C16-C17 | 121.1(4) | C567-C53-C54             | 171.1(13) |
| O3-Ag2-O1              | 147.10(11) | C15-C16-C26 | 119.7(3) | C55-C54-C53              | 139.6(16) |
| O3-Ag2-N2 <sup>2</sup> | 115.51(13) | C17-C16-C26 | 119.2(4) | C54-C55-C56              | 99.4(16)  |
| C1-O1-Ag2              | 125.4(3)   | C12-C17-C16 | 118.6(4) | C537-C56-C55             | 128.2(16) |
| C1-O2-Ag1              | 124.2(3)   | C12-C17-C18 | 120.3(4) | C57-C58-C60 <sup>5</sup> | 122(2)    |
| C3-O3-Ag2              | 121.0(3)   | C16-C17-C18 | 121.0(4) | C59-C58-C57              | 116(2)    |
| C3-O4-Ag1              | 117.7(3)   | C26-C21-C22 | 122.3(4) | C59-C58-C60 <sup>5</sup> | 17.0(14)  |

|                         |          |                          |           |                           |           |
|-------------------------|----------|--------------------------|-----------|---------------------------|-----------|
| C5-N1-Ag1               | 146.6(4) | C21-C22-C23              | 119.5(5)  | C625-C58-C57              | 42(5)     |
| C27-N2-Ag2 <sup>3</sup> | 152.8(4) | C22-C23-C27              | 120.8(4)  | C625-C58-C59              | 157(6)    |
| C34-N3-Ag1 <sup>4</sup> | 168.0(4) | C24-C23-C22              | 119.6(4)  | C625-C58-C60 <sup>5</sup> | 153(6)    |
| O1-C1-C2                | 116.8(4) | C24-C23-C27              | 119.6(4)  | C625-C58-C63              | 81(5)     |
| O2-C1-O1                | 129.9(4) | C23-C24-C25              | 120.2(4)  | C63-C58-C57               | 122.4(19) |
| O2-C1-C2                | 113.2(4) | C26-C25-C24              | 120.7(5)  | C63-C58-C59               | 122(2)    |
| F1-C2-F2                | 107.6(4) | C21-C26-C16              | 122.0(4)  | C63-C58-C60 <sup>5</sup>  | 113(2)    |
| F1-C2-F3                | 106.6(5) | C21-C26-C25              | 117.7(4)  | C60-C59-C58               | 110(3)    |
| F1-C2-C1                | 113.6(4) | C25-C26-C16              | 120.3(4)  | C605-C59-C58              | 114(7)    |
| F2-C2-F3                | 106.5(4) | N2-C27-C23               | 178.4(5)  | C605-C59-C60              | 60(7)     |
| F2-C2-C1                | 111.6(4) | C29-C28-C33              | 121.0(5)  | C605-C59-C61 <sup>5</sup> | 115(7)    |
| F3-C2-C1                | 110.5(4) | C30-C29-C28              | 120.0(5)  | C615-C59-C58              | 47(2)     |
| O3-C3-C4                | 115.2(5) | C29-C30-C31              | 120.2(4)  | C615-C59-C60              | 155(4)    |
| O4-C3-O3                | 130.4(5) | C29-C30-C34              | 118.9(4)  | C59-C60-C61               | 134(4)    |
| O4-C3-C4                | 114.4(5) | C31-C30-C34              | 120.9(4)  | C585-C61-C57 <sup>5</sup> | 66.7(19)  |
| F4-C4-C3                | 110.2(6) | C30-C31-C32              | 119.1(4)  | C585-C61-C60              | 91(3)     |
| F5-C4-F4                | 102.0(6) | C33-C32-C31              | 122.0(4)  | C585-C61-C62              | 23.7(18)  |
| F5-C4-F6                | 111.5(8) | C28-C33-C14              | 120.1(4)  | C60-C61-C57 <sup>5</sup>  | 156(2)    |
| F5-C4-C3                | 112.9(6) | C32-C33-C14              | 122.1(4)  | C60-C61-C62               | 113(2)    |
| F6-C4-F4                | 101.3(6) | C32-C33-C28              | 117.7(4)  | C62-C61-C57 <sup>5</sup>  | 44.2(13)  |
| F6-C4-C3                | 117.1(5) | N3-C34-C30               | 177.1(5)  | C575-C62-C61              | 73.4(18)  |
| N1-C5-C6                | 178.2(5) | C36-C35-C36 <sup>5</sup> | 107.3(12) | C575-C62-C63 <sup>5</sup> | 166(3)    |
| C7-C6-C5                | 119.9(4) | C35-C36-C37              | 129.9(10) | C575-C62-C63              | 166(3)    |
| C7-C6-C11               | 120.1(4) | C36-C37-C38              | 116.0(8)  | C635-C62-C61              | 118(2)    |
| C11-C6-C5               | 120.0(4) | C375-C38-C37             | 120.5(10) | C63-C62-C61               | 118(2)    |
| C6-C7-C8                | 120.3(5) | C39-C38-C37              | 119.7(5)  | C635-C62-C63              | 0.0(6)    |
| C9-C8-C7                | 120.2(5) | C39-C38-C37 <sup>5</sup> | 119.7(5)  | C58-C63-C58 <sup>5</sup>  | 97(2)     |
| C8-C9-C12               | 119.7(4) | C42-C41-C40              | 116.3(10) | C58-C63-C62               | 122.0(16) |
| C10-C9-C8               | 119.1(4) | C436-C41-C40             | 120.2(9)  | C585-C63-C62              | 25.4(11)  |
| C10-C9-C12              | 121.2(4) | C436-C41-C42             | 123.4(7)  | C58-C63-C62 <sup>5</sup>  | 25.4(11)  |
| C9-C10-C11              | 121.4(4) | C43-C42-C41              | 116.8(7)  | C585-C63-C62 <sup>5</sup> | 122.0(16) |
| C10-C11-C6              | 118.9(5) | C42-C43-C41 <sup>6</sup> | 119.8(7)  | C625-C63-C62              | 147(2)    |
| C13-C12-C9              | 119.5(4) | C46-C45-C44              | 122.2(8)  | C635-C63-C58 <sup>5</sup> | 0(10)     |
| C13-C12-C17             | 121.4(4) | C46-C45-C50              | 118.2(7)  | C635-C63-C58              | 0(10)     |



|             |          |             |          |                           |       |
|-------------|----------|-------------|----------|---------------------------|-------|
| C17-C12-C9  | 119.1(4) | C50-C45-C44 | 119.6(8) | C635-C63-C62              | 0(10) |
| C12-C13-C14 | 119.0(4) | C45-C46-C47 | 121.5(7) | C635-C63-C62 <sup>5</sup> | 0(10) |
| C12-C13-C20 | 119.8(4) | C46-C47-C48 | 118.9(8) |                           |       |
| C14-C13-C20 | 121.2(4) | C49-C48-C47 | 119.0(8) |                           |       |

<sup>1</sup>1/2+X,1/2+Y,+Z; <sup>2</sup>1/2-X,-1/2+Y,1/2-Z; <sup>3</sup>1/2-X,1/2+Y,1/2-Z; <sup>4</sup>-1/2+X,-1/2+Y,+Z; <sup>5</sup>1-X,+Y,1/2-Z; <sup>6</sup>1/2-X,3/2-Y,-Z; <sup>7</sup>1/2-X,3/2-Y,1-Z
